# Supplementary material for: Mobile App-Based Interventions to Support Diabetes Self-Management: A Systematic Review of Randomized Controlled Trials to Identify Functions Associated with Glycemic Efficacy
Source: PubMed Central journal article supplement (PMC5373677; doi:10.2196/mhealth.6522), 2017-03-14
Supplement: mhealth_v5i3e35_app1.pdf [file mhealth_v5i3e35_app1.pdf]

# Multimedia Appendix 1 Taxonomy development and validation

## A Flow chart of taxonomy development

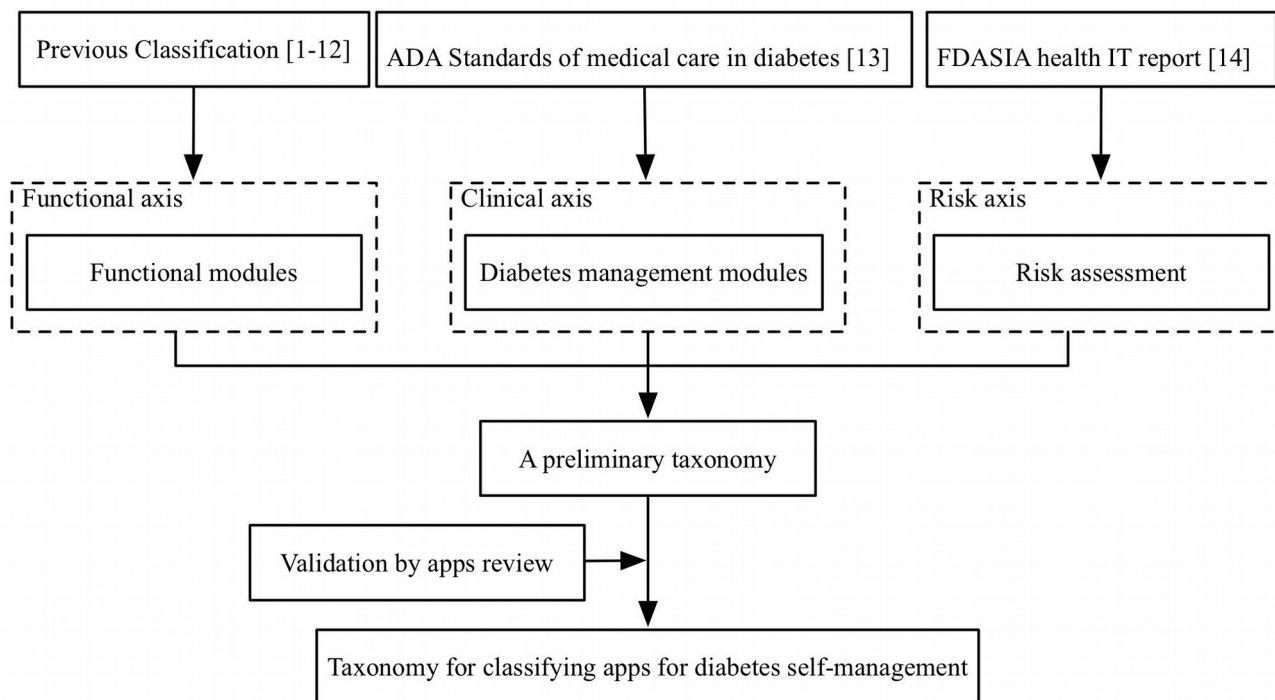

ADA, American Diabetes Associations. FDA, Food and Drug Administration.

## B Review of previous classifications of mobile health technology for diabetes management

| Author year        | Review                    | Classification                       | Functionalities                                                                                                                                                                                                                          | Our judgements                                                           |                                                |                 |                                                                                                                                                                                                                                             |
|--------------------|---------------------------|--------------------------------------|------------------------------------------------------------------------------------------------------------------------------------------------------------------------------------------------------------------------------------------|--------------------------------------------------------------------------|------------------------------------------------|-----------------|---------------------------------------------------------------------------------------------------------------------------------------------------------------------------------------------------------------------------------------------|
|                    |                           |                                      |                                                                                                                                                                                                                                          | Functional consideration                                                 | Clinical consideration                         | Risk assessment | Comments                                                                                                                                                                                                                                    |
| De Ridder 2016 [1] | 34 studies                | Incentive-driven technologies (IDTs) | Education, reminder, feedback, social, alert, gasification, financial                                                                                                                                                                    | Education, reminder, feedback, social, alert, gamification, financial    | -                                              | -               | Without clinical consideration and risk assessment;<br>Broad definition of functionalities without descriptive details;                                                                                                                     |
| Basilico 2016 [2]  | 41 apps in Apple US store | Features                             | Blood glucose/medication/nutrition/activity log, data representation/delivery, insulin calculator, community support                                                                                                                     | log, data representation/delivery, insulin calculator, community support | Blood glucose, medication, nutrition, activity | -               | Without risk assessment;                                                                                                                                                                                                                    |
| Riazi 2015 [3]     | 67 studies                | Interventions                        | Telephone coaching, clinical decision support system, electronic medical record, distance learning, computerized insulin dose adjustment, personal health record, mobile health/short message service, telemedicine/telehealth summation | Telehealth coaching and education, CDSS, PHR                             | Insulin                                        | -               | Without risk assessment;<br>Without systematic clinical consideration in each functionality (ie, education);<br>Broad definition of functionalities without descriptive details (eg, short message service);<br>Duplicated functionalities; |
| Williams 2015 [4]  | 20 apps                   | Features and functionalities         | Blood glucose recording/annotation, activity logs, data exportation/uploading, connect directly with a glucometer, reminder to take medications or check blood glucose                                                                   | Recording and log, data transmission, connection, reminder               | Blood glucose, activity, medication            | -               | Without risk assessment;                                                                                                                                                                                                                    |
| Lewis 2014         | -                         | Functionalities                      | Low risk and pose minimal risk to patients if                                                                                                                                                                                            | Education, communication with                                            | BMI, medication                                | Low risk, harm, | Broad definition without                                                                                                                                                                                                                    |

|                   |                        |                              |                                                                                                                                                                                                                                                                                                                                                                                                                                                                                                                                                                                                                                                                      |                                                                                                                                                    |                                                                            |                              |                                                                                                                                                                                                                                                                                                              |
|-------------------|------------------------|------------------------------|----------------------------------------------------------------------------------------------------------------------------------------------------------------------------------------------------------------------------------------------------------------------------------------------------------------------------------------------------------------------------------------------------------------------------------------------------------------------------------------------------------------------------------------------------------------------------------------------------------------------------------------------------------------------|----------------------------------------------------------------------------------------------------------------------------------------------------|----------------------------------------------------------------------------|------------------------------|--------------------------------------------------------------------------------------------------------------------------------------------------------------------------------------------------------------------------------------------------------------------------------------------------------------|
| [5]               |                        | and risks                    | <p>misused: BMI calculator, patient education, accessing PHR, access guidelines, formulary;</p> <p>Cause harm if used inappropriately or without adequate training: inter professional consultation and referral, drug conversion apps, entering treatment requests;</p> <p>Significant risk to patients due to either inherent complexity functionality or potential for harm if misuse: diagnostic support apps, patient decision apps, medical calculators;</p> <p>Apps pose significant risk to patients due to combination of inherent complexity, functionality and potential for major harm if misused: clinical decision support tools, control devices;</p> | healthcare providers, CDSS, diagnose                                                                                                               |                                                                            | significant risk, major harm | <p>descriptive details of functionalities;</p> <p>Without systematic clinical consideration in each functionality (ie, education, CDSS, diagnose);</p> <p>Unclear boundary between different risk levels;</p> <p>Unclear definition of misuse;</p> <p>Not based on comprehensive apps or studies review;</p> |
| El-Gayar 2013 [6] | 71 apps and 16 studies | Functions                    | Blood glucose, medication, diet, physical exercise, education, weight, blood pressure, communication, PHR, decision support, data entry automation, security, social networking                                                                                                                                                                                                                                                                                                                                                                                                                                                                                      | Track, education, communication, PHR, decision support, data entry automation, security, social networking                                         | Blood glucose, medication, diet, physical exercise, weight, blood pressure | -                            | <p>Without risk assessment;</p> <p>Without systematic clinical consideration in each functionality (ie, education, decision support);</p>                                                                                                                                                                    |
| El-Gayar 2013 [7] | 104 studies            | Technology and functionality | <p>Internet: sending glucose level, medication and diet information; enquiring; accessing of personal electronic medical record, data visualising; education; feedback;</p> <p>Phone: uploading the glucose level; messaging the clinicians; self-management decision support; automatic glucose level upload;</p> <p>Decision support: real-time feedback; insulin and medication regimen; integrated with patient's</p>                                                                                                                                                                                                                                            | Data transmission, data, visualising, automation, PHR, education, feedback, communication with clinicians, DSS on self-management, CDSS on regimen | Glucose, medication, diet                                                  | -                            | <p>Without risk assessment;</p> <p>Without systematic clinical consideration in each functionality (ie, education, feedback, DSS, CDSS);</p> <p>Duplicated functionalities due to categorised by technology (ie, the internet, phone, and decision</p>                                                       |

|                      |                 |               |                                                                                                                                                                                                                                    |                                                                                                       |                                                                     |   |                                                                                                                                                                                       |
|----------------------|-----------------|---------------|------------------------------------------------------------------------------------------------------------------------------------------------------------------------------------------------------------------------------------|-------------------------------------------------------------------------------------------------------|---------------------------------------------------------------------|---|---------------------------------------------------------------------------------------------------------------------------------------------------------------------------------------|
|                      |                 |               | <p>medical record;</p> <p>Telemedicine: video conferencing with clinicians; uploading and transmitting data; receiving feedback</p>                                                                                                |                                                                                                       |                                                                     |   | support);                                                                                                                                                                             |
| Arsand 2012 [8]      | 10 apps         | Functions     | Automatic BG data transfer, educational SMS, mobile diary, diary integration with HC providers, picture diary, automatic step counter, food information on phone, context sensitivity, mobile BG modelling                         | Data transmission, education, diary, communication with healthcare providers                          | Blood glucose, physical exercise, food                              | - | Without risk assessment; Without systematic clinical consideration in each functionality (ie, education, diary);                                                                      |
| Demidowit h 2012 [9] | 42 Android apps | Features      | SMBG recording, a tool to track insulin or oral diabetic medications, a prandial insulin dose calculator, track bodyweight or blood pressure, graphing, data exporting or synchronisation with PHR                                 | Track and recording, insulin dose calculator, graphing, data exporting, data synchronisation with PHR | SMBG, bodyweight, blood pressure, medications and insulin           | - | Without risk assessment;                                                                                                                                                              |
| Holtz 2012 [10]      | 21 studies      | Functions     | Diary/log to record data such as blood glucose readings, carbohydrate or calorie consumption or physical activity, reminders, information/education, Bluetooth/wire/signal/manually data transmission between phone and glucometer | Diary, reminders, education, data transmission                                                        | Blood glucose, carbohydrate, calorie consumption, physical activity | - | Without risk assessment; Broad definition of functionalities without descriptive details; Without systematic clinical consideration in each functionality (ie, education, reminders); |
| Liang 2011 [11]      | 22 studies      | Interventions | Provide support for SMBG, continuous education, reinforcement of diet, exercise and medication adjustment                                                                                                                          | Education                                                                                             | SMBG, diet, exercise, medication and                                | - | Without risk assessment; Broad definition of functionalities;                                                                                                                         |

|                  |                   |          |                                                                                                                                                                                                                                                                                                                                                                                                           |                                                                                                                                         |                                                                                              |   |                                                                                                    |
|------------------|-------------------|----------|-----------------------------------------------------------------------------------------------------------------------------------------------------------------------------------------------------------------------------------------------------------------------------------------------------------------------------------------------------------------------------------------------------------|-----------------------------------------------------------------------------------------------------------------------------------------|----------------------------------------------------------------------------------------------|---|----------------------------------------------------------------------------------------------------|
|                  |                   |          |                                                                                                                                                                                                                                                                                                                                                                                                           |                                                                                                                                         | insulin                                                                                      |   |                                                                                                    |
| Rao 2010<br>[12] | 22 iPhone<br>apps | Features | Glucose/carbohydrate/insulin/medicine/activity/<br>weight/blood pressure tracking, meal-time<br>tagging, preset/custom note, food database, color<br>coded for hypo/hyper, trend chart<br>length/widescreen mode/logbook view/direct<br>entry from logbook/background themes,<br>averages/standard deviation, email composer<br>(comma-separated values), target range settings,<br>auto synch to website | Tracking, tagging/notes/colour<br>coded, database, multiple<br>displays, manual entry, multiple<br>statistics, data exportation (email) | Blood glucose,<br>diet, exercise,<br>weight, blood<br>pressure,<br>medication and<br>insulin | - | Without risk assessment;<br>Duplicated functionalities<br>due to narrow definition of<br>each one; |

## C Development of the preliminary taxonomy

### Functional axis

| Functionalities [1-12]                                                                                                                                                                                         | Structured classification framework |                                                                                                                                                                                                                                               |
|----------------------------------------------------------------------------------------------------------------------------------------------------------------------------------------------------------------|-------------------------------------|-----------------------------------------------------------------------------------------------------------------------------------------------------------------------------------------------------------------------------------------------|
|                                                                                                                                                                                                                | Functional modules                  | Descriptive Details                                                                                                                                                                                                                           |
| Uploading blood glucose, blood pressure, medication and other information by self-log or paired medical devices;                                                                                               | Log                                 | Collecting personal parameters and information from mobile device itself or from separate devices connected to it;<br><br>The basic functionality of mobile health technology for management of diabetes.                                     |
| Visualizing physiological, and medical data;<br>Log book;<br>Display patterns of fluctuations;<br>Add tags and notes;<br>Export and share                                                                      | Structured display                  | Organizing tracked data in a structured way                                                                                                                                                                                                   |
| Diabetes recipes, disease information, instructions for self-management and behaviour change through electronic educational materials on the storage, offline database, email, text message, video or website; | General education                   | Diabetes self-management education                                                                                                                                                                                                            |
| Real-time reminders and feedback for entered data;<br>Medication and insulin regimen adjustment and recommendations;<br>Management dedicated decision support software;<br>Clinical decision support system;   | Personalized feedback               | Processing tracked data and generating personalized goals, reminders and feedback instantly.                                                                                                                                                  |
| Patient-patient communication;<br>Video conferencing with clinicians;<br>Messaging the clinicians;<br>Providing feedback to patients by the clinicians;                                                        | Communication                       | General communication, connecting users with their peers and families through social networking, chat forums, or websites;<br><br>Patient-clinician communication, in-app access to healthcare providers for medical support or consultation. |

## Clinical axis

| ADA Foundations of Care<br>[13] | Structured classification framework |                                                                                                                                                                                                                                                        |
|---------------------------------|-------------------------------------|--------------------------------------------------------------------------------------------------------------------------------------------------------------------------------------------------------------------------------------------------------|
|                                 | Diabetes management modules         | Descriptive Details                                                                                                                                                                                                                                    |
| SMBG                            | Monitoring                          | Self-monitoring parameters including blood glucose and blood pressure.<br>Other medical parameters including cholesterol levels, HbA1c, urine and blood testing.<br>The basic functionality of mobile health technology for management of diabetes.    |
| Immunization                    | Medication management               | Medications for diabetes including insulin, oral antidiabetic agents, aspirin, antihypertensive, lipid-lowering medications, and vaccinations.                                                                                                         |
| Nutrition                       | Lifestyle modification              | Healthy eating and being active.                                                                                                                                                                                                                       |
| Physical Activity               |                                     |                                                                                                                                                                                                                                                        |
| Education                       | -                                   | A functional component                                                                                                                                                                                                                                 |
| Smoking Cessation               | Complication prevention             | Prevent diabetes-related chronic and acute complications. Acute complications include hypoglycemia and hyperglycemia; chronic complications include cardiovascular disease and microvascular complications (ie, nephropathy, retinopathy, neuropathy). |
| Psychosocial Care               | Psychosocial care                   | Physical and emotional care                                                                                                                                                                                                                            |

## Risk axis

| FDA risk-based framework [14]                                                                                                                                                                                                                                                                                                                                                                                             |                                                                                     | Structured classification framework                                                                                                                                                                                                                                                                                                                                                 |                       |
|---------------------------------------------------------------------------------------------------------------------------------------------------------------------------------------------------------------------------------------------------------------------------------------------------------------------------------------------------------------------------------------------------------------------------|-------------------------------------------------------------------------------------|-------------------------------------------------------------------------------------------------------------------------------------------------------------------------------------------------------------------------------------------------------------------------------------------------------------------------------------------------------------------------------------|-----------------------|
| Functionalities                                                                                                                                                                                                                                                                                                                                                                                                           | Risk recommendations                                                                | Functions                                                                                                                                                                                                                                                                                                                                                                           | Risk Assessment       |
| <p>Scheduling;</p> <p>Analysis of historical claims data to predict future utilisation or cost-effectiveness;</p> <p>Population health management;</p> <p>General purpose communications;</p>                                                                                                                                                                                                                             | <p>Pose limited or no risk to patient safety;</p>                                   | <p>Track self-monitoring parameters (ie. blood glucose and blood pressures);</p> <p>Structured display;</p> <p>General education of instructions for monitoring, lifestyle modification and psychosocial care;</p> <p>Personalized feedback concerning customised reminders;</p> <p>Patient-patient and patient-family communication;</p>                                           | <p>Low risk</p>       |
| <p>Health information and data management;</p> <p>Data capture and encounter documentation;</p> <p>Electronic access to clinical results;</p> <p>Some clinical decision support;</p> <p>Medication management (electronic medication administration records);</p> <p>Electronic communication and coordination (i.e. provider to patient, patient to provider, etc.)</p> <p>Knowledge (clinical evidence) management;</p> | <p>Potential safety risks are generally low compared to the potential benefits;</p> | <p>Track profession-monitoring parameters (ie, cholesterol levels, HbA1c, urine and blood testing);</p> <p>General educations of interpreting parameters, treatment and medications and complication prevention;</p> <p>Personalized feedback concerning target setting and self-management decision making in lifestyle modification;</p> <p>Patient-clinicians communication;</p> | <p>Potential risk</p> |
| <p>Most Drug dosing calculations;</p> <p>Medical-device accessories;</p> <p>Clinical decision support;</p> <p>Suggestions for possible diagnoses;</p>                                                                                                                                                                                                                                                                     | <p>Present greater risks to patient safety;</p>                                     | <p>Clinical decision making on adjusting to current treatment (eg, oral agents, and insulin) by mobile health algorithms alone without the involvement of healthcare providers.</p>                                                                                                                                                                                                 | <p>High risk</p>      |



#### D Validation of the structured classification framework by on-market apps review

##### Flow chart for selection of apps

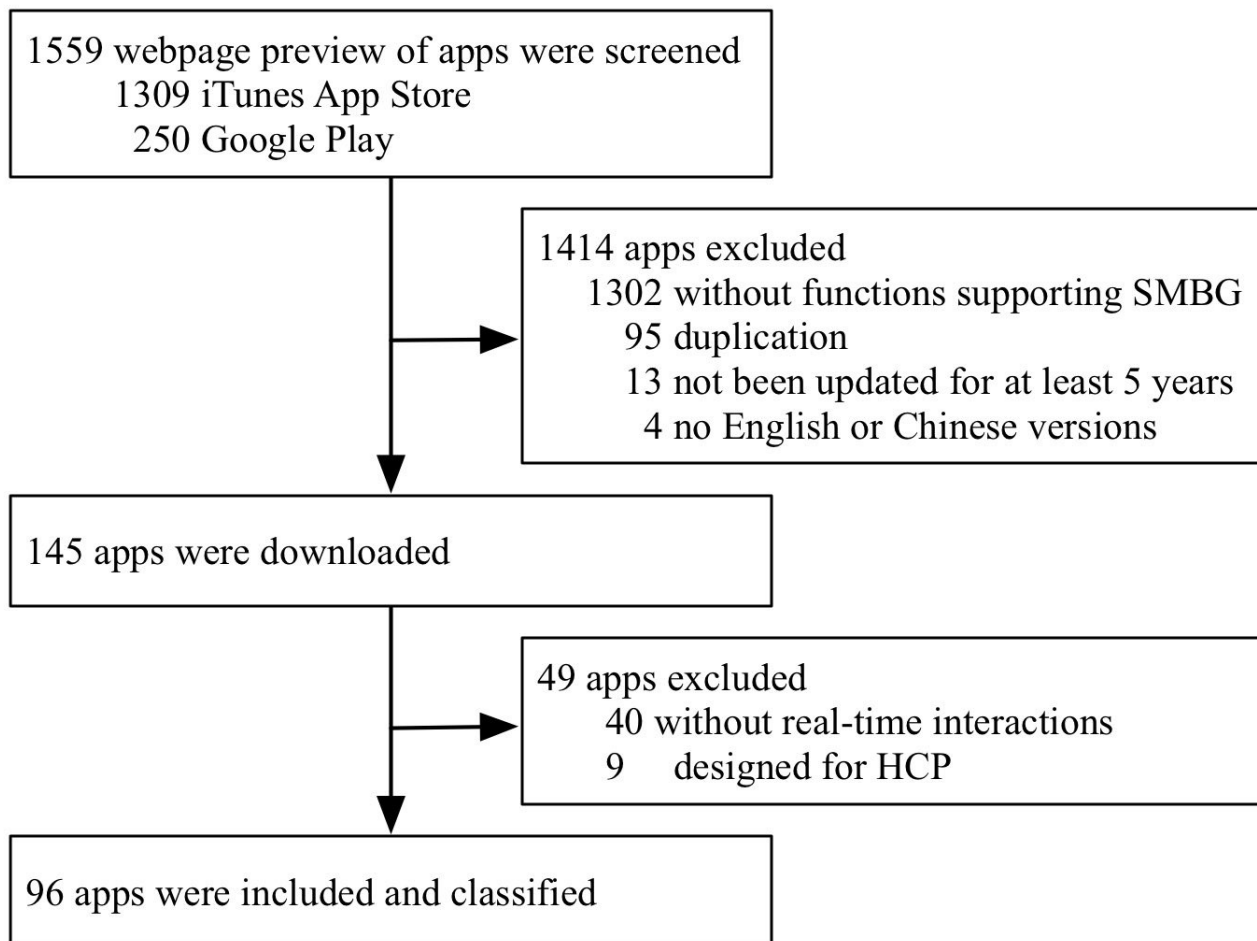

SMBG, self-monitoring of blood glucose. HCP, health care providers.

## Structured classifications for functions of included apps

### AADE Diabetes Goal Tracker

| Functions                                                                                                                                                                                                                                                                                             | Functional modules    | Diabetes management modules                                                                 | Risk assessment |
|-------------------------------------------------------------------------------------------------------------------------------------------------------------------------------------------------------------------------------------------------------------------------------------------------------|-----------------------|---------------------------------------------------------------------------------------------|-----------------|
| Share goals with the community;<br>Support each other by sending each other push notifications;<br>Link-up over Facebook;<br>Award points to others by accepting their support;                                                                                                                       | Communication         | -                                                                                           | Low Risk        |
| Stay on track with your goals;                                                                                                                                                                                                                                                                        | Track                 | Monitoring                                                                                  |                 |
| Customizable reminders ;                                                                                                                                                                                                                                                                              | Personalized feedback | Monitoring                                                                                  | Low Risk        |
| Edit your daily totals in profile settings under Recommended Daily Allowance to individualize goals;                                                                                                                                                                                                  | Personalized feedback | Lifestyle modification                                                                      | Potential risk  |
| Learn about what you're eating to better manage your diabetes;<br>Search for common foods and restaurant items or scan the barcode to see nutritional values;<br>Log items under breakfast, lunch, dinner or snacks to view your total intake of calories, carbs, sodium and total fats for each day; | General education     | Lifestyle modification                                                                      | Low risk        |
| Focus on areas of diabetes management: healthy eating, being active, monitoring, taking medication, problem solving, reducing risks and healthy coping.                                                                                                                                               | General education     | Monitoring; Lifestyle modification; Medications; Complication prevention; Psychosocial care | Potential risk  |

### Diabetes Tracker

| Functions                                                                                    | Functional modules    | Diabetes management modules | Risk assessment |
|----------------------------------------------------------------------------------------------|-----------------------|-----------------------------|-----------------|
| Track blood glucose;<br>Track blood pressure;                                                | Track                 | Monitoring                  | Low risk        |
| Keep a track of your Insulin intake and all your Medicines.                                  | Track                 | Medications                 | Potential risk  |
| Diet Diary                                                                                   | Track                 | Lifestyle modification      |                 |
| View current, detailed or average readings in a list view or via detailed graphs and reports | Structured display    | -                           | Low risk        |
| Reminders to check Blood Glucose                                                             | Personalized feedback | Monitoring                  | Low risk        |
| Reminders to track medicines                                                                 | Personalized feedback | Medications                 | Potential risk  |
| Reminders of appointments                                                                    | Personalized feedback | Complication prevention     | Low risk        |
| Reminders to maintain exercise schedules                                                     | Personalized feedback | Lifestyle modification      | Low risk        |
| Diet Guidelines;<br>Exercises with proper instructions and images;                           | General education     | lifestyle modification      | Low risk        |
| Maintain an extensive list of Doctors and call them from                                     | Communication         | -                           | Potential risk  |

|                 |  |  |  |
|-----------------|--|--|--|
| within the app. |  |  |  |
|-----------------|--|--|--|

## SocialDiabetes

| Functions                                                                                               | Functional modules    | Diabetes management modules | Risk assessment |
|---------------------------------------------------------------------------------------------------------|-----------------------|-----------------------------|-----------------|
| Track blood glucose;                                                                                    | Track                 | Monitoring                  | Low risk        |
| Track food;                                                                                             | Track                 | Lifestyle modification      | Low risk        |
| Track insulin;                                                                                          | Track                 | Medications                 | Potential risk  |
| Graphs;                                                                                                 | Structured display    | -                           | Low risk        |
| Insulin correction recommendations;                                                                     | Personalized feedback | Medications                 | High risk       |
| Food database with nutrition;                                                                           | General education     | Lifestyle modification      | Low risk        |
| Advice to prevent hypoglycemia;                                                                         | General education     | Complication prevention     | Potential risk  |
| Share with other users;                                                                                 | Communication         | -                           | Low risk        |
| ACE Medical Device, Council Directive 93/42/EEC that meets the highest standards of safety and quality. |                       |                             |                 |

## Diabetes Tracker

| Functions                                                                                                                                                                                                                                                                                                                                                                                                                      | Functional modules    | Diabetes management modules | Risk assessment |
|--------------------------------------------------------------------------------------------------------------------------------------------------------------------------------------------------------------------------------------------------------------------------------------------------------------------------------------------------------------------------------------------------------------------------------|-----------------------|-----------------------------|-----------------|
| Comprehensive blood glucose tracking;<br>BP tracking;                                                                                                                                                                                                                                                                                                                                                                          | Track                 | Monitoring                  | Low risk        |
| HbA1c, LDL, HDL tracking;                                                                                                                                                                                                                                                                                                                                                                                                      | Track                 | Monitoring                  | Potential risk  |
| Optional insulin tracking<br>Medication tracking                                                                                                                                                                                                                                                                                                                                                                               | Track                 | Medications                 | Potential risk  |
| Food and carb tracking;<br>Exercise tracking;<br>Tracks your water intake;                                                                                                                                                                                                                                                                                                                                                     | Track                 | Lifestyle modification      | Low risk        |
| Labels per reading supported;<br>Detailed daily and weekly analysis, charts and reports;                                                                                                                                                                                                                                                                                                                                       | Structured Display    | -                           | Low risk        |
| Highlights out-of-range readings;<br>Practical BG reminders;<br>Optional meal reminders;                                                                                                                                                                                                                                                                                                                                       | Personalized feedback | Monitoring                  | Low risk        |
| Custom pre- and post-meal target ranges;                                                                                                                                                                                                                                                                                                                                                                                       | Personalized feedback | Monitoring                  | Potential risk  |
| Diet planning tools                                                                                                                                                                                                                                                                                                                                                                                                            | Personalized feedback | Lifestyle modification      | Potential risk  |
| Provide personalized diet advice, recommend articles and blogs, suggest tips and tricks                                                                                                                                                                                                                                                                                                                                        | General education     | Lifestyle modification      | Low risk        |
| Community supported by a Registered Dietitian                                                                                                                                                                                                                                                                                                                                                                                  | Communication         | -                           | High risk       |
| <p><b>DISCLAIMER</b></p> <p>Diabetes Tracker by MyNetDiary is an educational tool, it is not a medical device, it is not a substitute for a medical device or medical care, and it does not provide diagnosis, cure, mitigation, treatment, or prevention of any disease.</p> <p>If you have questions or concerns about individual health matters or management of your diabetes, please consult your diabetes care team.</p> |                       |                             |                 |

## RapidCalc Diabetes Manager

| Functions                                                                                                                                                                                                                                                                                                                                                                          | Functional modules    | Diabetes management modules | Risk assessment |
|------------------------------------------------------------------------------------------------------------------------------------------------------------------------------------------------------------------------------------------------------------------------------------------------------------------------------------------------------------------------------------|-----------------------|-----------------------------|-----------------|
| Track blood glucose;                                                                                                                                                                                                                                                                                                                                                               | Track                 | Monitoring                  | Low risk        |
| Estimates HbA1c;                                                                                                                                                                                                                                                                                                                                                                   | Track                 | Monitoring                  | Potential risk  |
| Track insulin;                                                                                                                                                                                                                                                                                                                                                                     | Track                 | Medications                 | Potential risk  |
| Track carbohydrates;                                                                                                                                                                                                                                                                                                                                                               | Track                 | Lifestyle modification      | Low risk        |
| Charting of blood glucose readings and trend data<br>Pre and post meal BG comparisons<br>Summary statistics for doses, glucose and carbohydrates                                                                                                                                                                                                                                   | Structured display    | -                           | Low risk        |
| Customised target                                                                                                                                                                                                                                                                                                                                                                  | Personalized feedback | Monitoring                  | Potential       |
| Calculate insulin                                                                                                                                                                                                                                                                                                                                                                  | Personalized feedback | Medications                 | High risk       |
| safety warnings and guidance                                                                                                                                                                                                                                                                                                                                                       | General education     | Complication prevention     | Potential risk  |
| <p><b>SAFETY INFORMATION</b></p> <p>RapidCalc is intended for guidance only and is not a substitute for professional medical advice. Always discuss use of the calculator with your health care professional and only use personal settings agreed with them. If you are in any doubt as to the correct insulin dose always follow the advice of your healthcare professional.</p> |                       |                             |                 |

## Diabetes Blood & Pressure Log

| Functions                                                                                                          | Functional modules    | Diabetes management modules        | Risk assessment |
|--------------------------------------------------------------------------------------------------------------------|-----------------------|------------------------------------|-----------------|
| Track blood glucose and blood pressure;                                                                            | Track                 | Monitoring                         | Low risk        |
| Track HbA1c;                                                                                                       | Track                 | Monitoring                         | Potential risk  |
| Track insulin;                                                                                                     | Track                 | Medications                        | Potential risk  |
| Track meal, carbohydrates calories and other nutrients;<br>Track exercise;<br>Track weight                         | Track                 | Lifestyle modification             | Low risk        |
| Trend and timeline of health vitals;<br>Add notes and remind yourself important things about health;               | Structured display    | -                                  | Low risk        |
| Remind to monitor                                                                                                  | Personalized feedback | Monitoring                         | Low risk        |
| Remind about medicines                                                                                             | Personalized feedback | Medications                        | Potential risk  |
| Analysis of Health records/ Medical reports;                                                                       | General education     | Monitoring                         | Potential risk  |
| Tips for diabetes, hypertension and weight loss;                                                                   | General education     | Monitoring, Lifestyle modification | Low risk        |
| Track your entire families health;<br>Remotely monitor your parents;<br>Weekly reports and alerts families health; | Communication         | -                                  | Low risk        |

## Care4life Diabetes

| Functions | Functional modules | Diabetes management | Risk |
|-----------|--------------------|---------------------|------|
|-----------|--------------------|---------------------|------|

|                                                                                                                                                               |                       | <b>modules</b>          | <b>assessment</b> |
|---------------------------------------------------------------------------------------------------------------------------------------------------------------|-----------------------|-------------------------|-------------------|
| Track blood glucose;                                                                                                                                          | Track                 | Monitoring              | Low risk          |
| Track step;                                                                                                                                                   | Track                 | Lifestyle modification  | Low risk          |
| Graph;                                                                                                                                                        | Structured display    | -                       | Low risk          |
| Set reminders for appointments;                                                                                                                               | Personalized feedback | Complication prevention | Low risk          |
| Set reminders for medications;                                                                                                                                | Personalized feedback | Medications             | Potential risk    |
| Healthy recipes;<br>Exercise tips;                                                                                                                            | General education     | Lifestyle modification  | Low risk          |
| Care4life content was developed in collaboration with the American Diabetes Association and uses text messages, a free app, videos, email and online website. |                       |                         |                   |

### Diabetes UK Tracker

| <b>Functions</b>                              | <b>Functional modules</b> | <b>Diabetes management modules</b> | <b>Risk assessment</b> |
|-----------------------------------------------|---------------------------|------------------------------------|------------------------|
| Track blood glucose and blood pressure;       | Track                     | Monitoring                         | Low risk               |
| Track HbA1c, ketones and lipid profile;       | Track                     | Monitoring                         | Potential risk         |
| Track insulin;                                | Track                     | Medications                        | Potential risk         |
| Track meal;<br>Track weight;                  | Track                     | Lifestyle modification             | Low risk               |
| Track feelings;                               | Track                     | Psychosocial care                  | Low risk               |
| Track appointments;                           | Track                     | Complication prevention            | Low risk               |
| Graph;<br>Note;                               | Structured display        | -                                  | Low risk               |
| Reminders;                                    | Personalized feedback     | -                                  | Low risk               |
| Share graph and notes on Facebook and Twitter | Communication             | -                                  | Low risk               |

### One drop for Diabetes Management

| <b>Functions</b>               | <b>Functional modules</b> | <b>Diabetes management modules</b> | <b>Risk assessment</b> |
|--------------------------------|---------------------------|------------------------------------|------------------------|
| Track blood glucose;           | Track                     | Monitoring                         | Low risk               |
| Track medications;             | Track                     | Medications                        | Potential risk         |
| Track food;<br>Track exercise; | Track                     | Lifestyle modification             | Low risk               |
| Tags and notes;                | Structured display        | -                                  | Low risk               |
| Customised reminders;          | Personalized feedback     | -                                  | Potential risk         |
| Food tips;                     | General education         | Lifestyle modification             | Low risk               |
| Share in community             | Communication             | -                                  | Low risk               |

### My Diabetes Coach

| <b>Functions</b> | <b>Functional modules</b> | <b>Diabetes management</b> | <b>Risk</b> |
|------------------|---------------------------|----------------------------|-------------|
|------------------|---------------------------|----------------------------|-------------|

|                                       |                       | <b>modules</b>          | <b>assessment</b> |
|---------------------------------------|-----------------------|-------------------------|-------------------|
| Track blood glucose;                  | Track                 | Monitoring              | Low risk          |
| Track medication;                     | Track                 | Medications             | Potential risk    |
| Track diet;<br>Track activity;        | Track                 | Lifestyle modification  | Low risk          |
| Track feet status                     | Track                 | Complication prevention | Low risk          |
| Chats;                                | Structured display    | -                       | Low risk          |
| Customised health goals;              | Personalized feedback | -                       | Potential risk    |
| Virtual coach;<br>Health information; | General education     | -                       | Potential risk    |

## Diamedic

| <b>Functions</b>                                                  | <b>Functional modules</b> | <b>Diabetes management modules</b> | <b>Risk assessment</b> |
|-------------------------------------------------------------------|---------------------------|------------------------------------|------------------------|
| Track blood glucose and blood pressure;                           | Track                     | Monitoring                         | Low risk               |
| Track lab result;                                                 | Track                     | Monitoring                         | Potential risk         |
| Track insulin and medications;                                    | Track                     | Medications                        | Potential risk         |
| Track carb intake;<br>Track exercise;<br>Track weight;            | Track                     | Lifestyle modification             | Low risk               |
| Track feet status                                                 | Track                     | Complication prevention            | Low risk               |
| Graphs;<br>Composite view;<br>Notes;                              | Structured display        | -                                  | Low risk               |
| Medications refill reminders;                                     | Personalized feedback     | Medications                        | Potential risk         |
| Dosage calculator;                                                | Personalized feedback     | Medications                        | High risk              |
| Exercise database;                                                | General education         | Lifestyle modification             | Low risk               |
| Insulin and medications database;<br>Insulin injection templates; | General education         | Medications                        | Potential risk         |

## Tactio Health

| <b>Functions</b>                                                                                                                                      | <b>Functional modules</b> | <b>Diabetes management modules</b> | <b>Risk assessment</b> |
|-------------------------------------------------------------------------------------------------------------------------------------------------------|---------------------------|------------------------------------|------------------------|
| Track blood glucose and blood pressure;                                                                                                               | Track                     | Monitoring                         | Low risk               |
| Track cholesterol, triglycerides, HDL and LDL;                                                                                                        | Track                     | Monitoring                         | Potential risk         |
| Track meal, carbohydrates calories and other nutrients;<br>Track steps and activity;<br>Track weight, height, waist size, BMI;<br>Track water intake; | Track                     | Lifestyle modification             | Low risk               |

|                                                                                                                                                                                                           |                       |                                       |                |
|-----------------------------------------------------------------------------------------------------------------------------------------------------------------------------------------------------------|-----------------------|---------------------------------------|----------------|
| Data presented by charts, computed factors and color coding;                                                                                                                                              | Structured display    | -                                     | Low risk       |
| Customised reminder;<br>Healthy goals;                                                                                                                                                                    | Personalized feedback | -                                     | Potential risk |
| A personalized nutrition plan                                                                                                                                                                             | Personalized feedback | Lifestyle modification                | Potential risk |
| Education about the disease, medications and lifestyle                                                                                                                                                    | General education     | Medications; Lifestyle modifications; | Potential risk |
| In light of the recent final guidance provided by the FDA on mobile medical apps, we have decided to temporarily disable the insulin adjustments for patients with Diabetes using insulin in Nov 20, 2013 |                       |                                       |                |

### PredicBGL

| Functions                                                                                                                                                                                                                                                                                                                                                                | Functional modules    | Diabetes management modules | Risk assessment |
|--------------------------------------------------------------------------------------------------------------------------------------------------------------------------------------------------------------------------------------------------------------------------------------------------------------------------------------------------------------------------|-----------------------|-----------------------------|-----------------|
| Track blood glucose;                                                                                                                                                                                                                                                                                                                                                     | Track                 | Monitoring                  | Low risk        |
| HbA1c estimate;                                                                                                                                                                                                                                                                                                                                                          | Track                 | Monitoring                  | Potential risk  |
| Track insulin;                                                                                                                                                                                                                                                                                                                                                           | Track                 | Medications                 | Potential risk  |
| Track meal, carbohydrates calories and other nutrients;<br>Track exercise;                                                                                                                                                                                                                                                                                               | Track                 | Lifestyle modification      | Low risk        |
| Graphs with blood glucose curves;                                                                                                                                                                                                                                                                                                                                        | Structured display    | -                           | Low risk        |
| Calculate insulin;<br>Basal Rates for insulin pump users;                                                                                                                                                                                                                                                                                                                | Personalized feedback | Medications                 | High risk       |
| Food databases with glycemic index;                                                                                                                                                                                                                                                                                                                                      | General education     | Lifestyle modification      | Low risk        |
| Explain blood glucose readings;                                                                                                                                                                                                                                                                                                                                          | General education     | Monitoring                  | Potential risk  |
| <p><b>SAFETY INFORMATION</b></p> <p>PredictBGL is intended for guidance only and is not a substitute for professional medical advice. Always discuss use of PredictBGL with a diabetes educator or physician and only use personal settings agreed with them. If in any doubt as to the correct insulin dose always follow the advice of a Health Care Professional.</p> |                       |                             |                 |

### mySugr Diabetes Logbook

| Functions                                                                                               | Functional modules    | Diabetes management modules | Risk assessment |
|---------------------------------------------------------------------------------------------------------|-----------------------|-----------------------------|-----------------|
| Track blood glucose and blood pressure;                                                                 | Track                 | Monitoring                  | Low risk        |
| Estimated HbA1c;<br>Track ketones                                                                       | Track                 | Monitoring                  | Potential risk  |
| Track medications and insulin;                                                                          | Track                 | Medications                 | Potential risk  |
| Track meal, carbohydrates calories and other nutrients;<br>Track steps and activities;<br>Track weight; | Track                 | Lifestyle modification      | Low risk        |
| Daily, weekly, monthly analysis;                                                                        | Structured display    | -                           | Low risk        |
| Personal therapy goals;<br>Motivating feedback;                                                         | Personalized feedback | Monitoring                  | Low risk        |

|                                                          |                       |             |           |
|----------------------------------------------------------|-----------------------|-------------|-----------|
| Remind to monitor;                                       |                       |             |           |
| Basal rates for insulin pump users;<br>Bolus Calculator; | Personalized feedback | Medications | High risk |
| Social sharing functions;                                | Communication         | -           | Low risk  |
| Registered (class 1) medical device                      |                       |             |           |

## Diabetes App/lite

| Functions                                                                                                               | Functional modules    | Diabetes management modules | Risk assessment |
|-------------------------------------------------------------------------------------------------------------------------|-----------------------|-----------------------------|-----------------|
| Track blood glucose and blood pressure;                                                                                 | Track                 | Monitoring                  | Low risk        |
| Track medications and insulin;                                                                                          | Track                 | Medications                 | Potential risk  |
| Track meal, carb intake, calories, other nutrients and water consumption;<br>Track activities;<br>Track weight and BMI; | Track                 | Lifestyle modification      | Low risk        |
| Put tracked parameters on the calendar;                                                                                 | Structured display    | -                           | Low risk        |
| Off-line food database                                                                                                  | General education     | Lifestyle modification      | Low risk        |
| Budget daily carb allowance                                                                                             | Personalized feedback | Lifestyle modification      | Potential risk  |

## t:simulator

| Functions                                                                                                                                                                                                                                                                                                 | Functional modules    | Diabetes management modules | Risk assessment |
|-----------------------------------------------------------------------------------------------------------------------------------------------------------------------------------------------------------------------------------------------------------------------------------------------------------|-----------------------|-----------------------------|-----------------|
| Track blood glucose and blood pressure;                                                                                                                                                                                                                                                                   | Track                 | Monitoring                  | Low risk        |
| Track insulin;                                                                                                                                                                                                                                                                                            | Track                 | Medications                 | Potential risk  |
| Customised note;<br>Trends;<br>View insulin history                                                                                                                                                                                                                                                       | Structured display    | -                           | Low risk        |
| Set reminder alarms for low and high blood glucose, and after bolus blood glucose                                                                                                                                                                                                                         | Personalized feedback | Monitoring                  | Low risk        |
| Set reminder alarms for missed meal boluses                                                                                                                                                                                                                                                               | Personalized feedback | Medications                 | Low risk        |
| Create customised basal rates, carb ratios, correction factors, and target Blood Glucose (BG) levels;<br>Program a meal bolus, using either units of insulin or grams of carbohydrate;<br>Program a correction bolus by entering a BG value;<br>Program an extended bolus;<br>Set a temporary basal rate; | Personalized feedback | Medications                 | High risk       |
| Technical specifications, glossary, and important safety information;                                                                                                                                                                                                                                     | General education     | Medications                 | Potential risk  |
| social media share                                                                                                                                                                                                                                                                                        | Communication         | -                           | Low risk        |
| Contact a Tandem Diabetes Care representative directly                                                                                                                                                                                                                                                    | Communication         | -                           | Potential risk  |



|                     |  |  |  |
|---------------------|--|--|--|
| from within the app |  |  |  |
| Tandem pump         |  |  |  |

### LogFrog DB/Lite

| Functions                                                                          | Functional modules    | Diabetes management modules | Risk assessment |
|------------------------------------------------------------------------------------|-----------------------|-----------------------------|-----------------|
| Track blood glucose and blood pressure;                                            | Track                 | Monitoring                  | Low risk        |
| Track HbA1c;                                                                       | Track                 | Monitoring                  | Potential risk  |
| Track insulin and oral medication;                                                 | Track                 | Medications                 | Potential risk  |
| Track carb intake;<br>Track exercise;<br>Track weight;                             | Track                 | Lifestyle modification      | Low risk        |
| Track doctor visits;                                                               | Track                 | Complication prevention     | Low risk        |
| Customised notes;<br>Graph by days or out to months ;                              | Structured display    | -                           | Low risk        |
| Set reminders to check blood glucose;<br>Set your ideal blood glucose value range; | Personalized feedback | Monitoring                  | Low risk        |
| Set reminders to take medications;                                                 | Personalized feedback | Medications                 | Potential risk  |

### HEALTheDiabetes

| Functions                                                                         | Functional modules    | Diabetes management modules | Risk assessment |
|-----------------------------------------------------------------------------------|-----------------------|-----------------------------|-----------------|
| Track blood glucose;                                                              | Track                 | Monitoring                  | Low risk        |
| Track insulin and oral medication;                                                | Track                 | Medications                 | Potential risk  |
| Track food, calories, carbs, and nutrition;<br>Track activities;<br>Track weight; | Track                 | Lifestyle modification      | Low risk        |
| Charts and trends;                                                                | Structured display    | -                           | Low risk        |
| Set targets: carbohydrate, calorie;                                               | Personalized feedback | Monitoring                  | Potential risk  |
| Set reminders to take medications;                                                | Personalized feedback | Medications                 | Potential risk  |
| Food database with nutrition;                                                     | General education     | Lifestyle modification      | Low risk        |

### Diabetes Management

| Functions                                                           | Functional modules | Diabetes management modules | Risk assessment |
|---------------------------------------------------------------------|--------------------|-----------------------------|-----------------|
| Track blood glucose;                                                | Track              | Monitoring                  | Low risk        |
| Track diet, calories, carbohydrates;<br>Track activities;           | Track              | Lifestyle modification      | Low risk        |
| Charts and trends;                                                  | Structured display | -                           | Low risk        |
| Food database with nutrition and glycemic index;<br>A healthy diet; | General education  | Lifestyle modification      | Low risk        |

|                                                               |                   |                         |                |
|---------------------------------------------------------------|-------------------|-------------------------|----------------|
| Symptoms of diabetes;                                         | General education | Complication prevention | Potential risk |
| Order tests and exams;<br>Order medicine and ancillary needs; | Communication     | -                       | Potential risk |

### BG Monitor Diabetes /Pro

| <b>Functions</b>                                                              | <b>Functional modules</b> | <b>Diabetes management modules</b> | <b>Risk assessment</b> |
|-------------------------------------------------------------------------------|---------------------------|------------------------------------|------------------------|
| Track blood glucose;                                                          | Track                     | Monitoring                         | Low risk               |
| Track insulin;                                                                | Track                     | Medications                        | Potential risk         |
| Track carbohydrates;<br>Track activities;                                     | Track                     | Lifestyle modification             | Low risk               |
| Detailed graphs;<br>Graphical reporting;<br>Notes and tags;                   | Structured display        | -                                  | Low risk               |
| Reminders of low and high blood glucose;<br>Reminders to check blood glucose; | Personalized feedback     | Monitoring                         | Low risk               |
| Reminders to give insulin;                                                    | Personalized feedback     | Medications                        | Potential risk         |
| Insulin calculator;                                                           | Personalized feedback     | Medications                        | High risk              |
| Food database;<br>Carbohydrates calculator;                                   | General education         | Lifestyle modification             | Low risk               |

### Track3

| <b>Functions</b>                                                                    | <b>Functional modules</b> | <b>Diabetes management modules</b> | <b>Risk assessment</b> |
|-------------------------------------------------------------------------------------|---------------------------|------------------------------------|------------------------|
| Track blood glucose;                                                                | Track                     | Monitoring                         | Low risk               |
| Track HbA1c                                                                         | Track                     | Monitoring                         | Potential risk         |
| Track insulin and medications;                                                      | Track                     | Medications                        | Potential risk         |
| Track food;<br>Track activities;<br>Track calories<br>Track weight;                 | Track                     | Lifestyle modification             | Low risk               |
| Chart blood glucose trends;<br>Tags;                                                | Structured display        | -                                  | Low risk               |
| Customised information for the foods and exercises;                                 | Personalized feedback     | Lifestyle modification             | Low risk               |
| Customised information for medications;                                             | Personalized feedback     | Medications                        | Potential risk         |
| Food database with carbohydrate and nutrition details;<br>Carb and calorie counter; | General education         | Lifestyle modification             | Low risk               |

### iFORA Diabetes Manager

| <b>Functions</b> | <b>Functional modules</b> | <b>Diabetes management modules</b> | <b>Risk assessment</b> |
|------------------|---------------------------|------------------------------------|------------------------|
|------------------|---------------------------|------------------------------------|------------------------|

|                                                                          |                       |                        |                |
|--------------------------------------------------------------------------|-----------------------|------------------------|----------------|
| Track blood glucose;                                                     | Track                 | Monitoring             | Low risk       |
| Track insulin dosage;                                                    | Track                 | Medications            | Potential risk |
| Track activities;<br>Track food intake;                                  | Track                 | Lifestyle modification | Low risk       |
| Statistic trend graph;<br>Target pie charts;<br>Record list;<br>Logbook; | Structured display    | -                      | Low risk       |
| Set target goal of blood glucose;<br>Color coded alert;                  | Personalized feedback | Monitoring             | Low risk       |
| Diabetes medications                                                     | General education     | Medications            | Potential risk |
| Healthy eating;<br>Regular exercise routine;                             | General education     | Lifestyle modification | Low risk       |

### ezbds

| <b>Functions</b>                                                        | <b>Functional modules</b> | <b>Diabetes management modules</b> | <b>Risk assessment</b> |
|-------------------------------------------------------------------------|---------------------------|------------------------------------|------------------------|
| Track blood glucose;                                                    | Track                     | Monitoring                         | Low risk               |
| Track insulin dosage and medications;                                   | Track                     | Medications                        | Potential risk         |
| Track meal, snack and carbs;<br>Track activities;<br>Track food intake; | Track                     | Lifestyle modification             | Low risk               |
| Graph;<br>Tag;                                                          | Structured display        | -                                  | Low risk               |
| Trending up alert;                                                      | Personalized feedback     | Monitoring                         | Low risk               |
| Insulin doses alert;                                                    | Personalized feedback     | Medications                        | Potential risk         |
| Drug dose calculating;                                                  | Personalized feedback     | Medications                        | High risk              |
| Healthy diet;                                                           | General education         | Lifestyle modification             | Low risk               |

### Diabetes Kit Blood Glucose Logbook

| <b>Functions</b>                                                           | <b>Functional modules</b> | <b>Diabetes management modules</b> | <b>Risk assessment</b> |
|----------------------------------------------------------------------------|---------------------------|------------------------------------|------------------------|
| Track blood glucose and blood pressure;                                    | Track                     | Monitoring                         | Low risk               |
| Track HbA1c;                                                               | Track                     | Monitoring                         | Potential risk         |
| Track insulin and medication;                                              | Track                     | Medications                        | Potential risk         |
| Track nutrition;<br>Track steps, activities and calories;<br>Track weight; | Track                     | Lifestyle modification             | Low risk               |
| Trend;                                                                     | Structured display        | -                                  | Low risk               |
| Insulin dose calculator;                                                   | Personalized feedback     | Medications                        | High risk              |

|                   |                   |   |                |
|-------------------|-------------------|---|----------------|
|                   |                   |   |                |
| Clinical insight; | General education | - | Potential risk |

## Diabetes PA

| Functions                                                                                           | Functional modules    | Diabetes management modules | Risk assessment |
|-----------------------------------------------------------------------------------------------------|-----------------------|-----------------------------|-----------------|
| Track blood glucose and blood pressure;                                                             | Track                 | Monitoring                  | Low risk        |
| Track HbA1c, cholesterol and ketones;                                                               | Track                 | Monitoring                  | Potential risk  |
| Track insulin and medication;                                                                       | Track                 | Medications                 | Potential risk  |
| Track mood and emotions;                                                                            | Track                 | Psychosocial care           | Low risk        |
| Track carbs and calories;<br>Track alcohol consumption;<br>Track exercise;<br>Track weight and BMI; | Track                 | Lifestyle modification      | Low risk        |
| Charts;<br>Graphs;                                                                                  | Structured display    | -                           | Low risk        |
| Reminders for medications;                                                                          | Personalized feedback | Medications                 | Potential risk  |

## Glucose Monitor

| Functions                                                     | Functional modules    | Diabetes management modules | Risk assessment |
|---------------------------------------------------------------|-----------------------|-----------------------------|-----------------|
| Track blood glucose and blood pressure;                       | Track                 | Monitoring                  | Low risk        |
| Track cholesterol;                                            | Track                 | Monitoring                  | Potential risk  |
| Track medications and insulin;                                | Track                 | Medications                 | Potential risk  |
| Statistics;<br>Graphs;                                        | Structured display    | -                           | Low risk        |
| Customised reminders for checking blood glucose;              | Personalized feedback | Monitoring                  |                 |
| Tips on improving glycemic control;<br>Diabetes health guide; | General education     | -                           | Potential risk  |
| Diabetes communities                                          | Communication         | -                           | Low risk        |

## Diabetes in Check

| Functions                                                                                                             | Functional modules    | Diabetes management modules | Risk assessment |
|-----------------------------------------------------------------------------------------------------------------------|-----------------------|-----------------------------|-----------------|
| Blood glucose tracking;                                                                                               | Track                 | Monitoring                  | Low risk        |
| Medication tracking;                                                                                                  | Track                 | Medications                 | Potential risk  |
| Exercise tracking;<br>Weight tracking;<br>Track carb by searching a database of over 80,000 foods or barcode scanner; | Track                 | Lifestyle modification      | Low risk        |
| Set reminders to measure blood glucose;                                                                               | Personalized feedback | Monitoring                  | Low risk        |

|                                                                                                                                 |                       |                        |                |
|---------------------------------------------------------------------------------------------------------------------------------|-----------------------|------------------------|----------------|
| Set and track exercise goals and stay motivated;<br>A personalized daily plan to help you stay on track and achieve your goals; | Personalized feedback | Lifestyle modification | Potential risk |
| Set reminders to take medications;                                                                                              | Personalized feedback | Medications            | Potential risk |
| Join a community of over 200,000 people who are also living with type 2 diabetes.                                               | Communication         | -                      | Low risk       |
| In-app support from a Certified Diabetes Educator                                                                               | Communication         | -                      | Potential risk |

## Diabetes Pilot Pro

| Functions                                                                                             | Functional modules    | Diabetes management modules | Risk assessment |
|-------------------------------------------------------------------------------------------------------|-----------------------|-----------------------------|-----------------|
| Records glucose and blood pressure;                                                                   | Track                 | Monitoring                  | Low risk        |
| Estimates HbA1c;                                                                                      | Track                 | Monitoring                  | Potential risk  |
| Record medications;                                                                                   | Track                 | Medications                 | Potential risk  |
| Records meals, exercise, weight;<br>Track carbohydrates, calories and nutrients by scanning barcodes; | Track                 | Lifestyle modification      | Low risk        |
| Customizable reports;<br>Notes about information;                                                     | Structured display    | -                           | Low risk        |
| Estimate your insulin for meals and correcting high glucose;                                          | Personalized feedback | Medications                 | High risk       |

## Daily Carb /Premium

| Functions                                                                                                                                                                                                                                                                                                                                                                       | Functional modules    | Diabetes management modules | Risk assessment |
|---------------------------------------------------------------------------------------------------------------------------------------------------------------------------------------------------------------------------------------------------------------------------------------------------------------------------------------------------------------------------------|-----------------------|-----------------------------|-----------------|
| Track blood glucose and blood pressure;                                                                                                                                                                                                                                                                                                                                         | Track                 | Monitoring                  | Low risk        |
| Track HbA1c;<br>Track cholesterol, triglycerides, HDL and LDL;                                                                                                                                                                                                                                                                                                                  | Track                 | Monitoring                  | Potential risk  |
| Track medications and insulin;                                                                                                                                                                                                                                                                                                                                                  | Track                 | Medications                 | Potential risk  |
| Track meal, carbohydrates calories and other nutrients;<br>Track exercise by date, duration, name and intensity;<br>Track weight;<br>Track water intake;                                                                                                                                                                                                                        | Track                 | Lifestyle modification      | Low risk        |
| Analyze tracked parameters by chart;<br>Add note to reading;<br>Calendar overview of data;                                                                                                                                                                                                                                                                                      | Structured display    | -                           | Low risk        |
| Customised reminder                                                                                                                                                                                                                                                                                                                                                             | Personalized feedback | -                           | Potential risk  |
| Calculate insulin                                                                                                                                                                                                                                                                                                                                                               | Personalized feedback | Medications                 | High risk       |
| <p>For the insulin calculation function, it is based this formula:</p> $\text{Insulin dosage} = (\text{Blood Sugar} - \text{Goal Blood Sugar}) / \text{Correction Factor} + \text{Carbohydrate} / \text{Carbohydrate Factor}$ <p>Please do consult your physician before using it to check if the formula is suitable for you, and ask for your personal Correction Factor,</p> |                       |                             |                 |

Carbohydrate Factor, Goal Blood Sugar from him/her, and please take note of the unit (mg/dL or mmol/L). The user assumes all responsibility for the numbers inputted and the result.

## Glucose Wiz/pro

| Functions                                                                                                                                                                         | Functional modules    | Diabetes management modules | Risk assessment |
|-----------------------------------------------------------------------------------------------------------------------------------------------------------------------------------|-----------------------|-----------------------------|-----------------|
| Track blood glucose;                                                                                                                                                              | Track                 | Monitoring                  | Low risk        |
| Track medications;                                                                                                                                                                | Track                 | Medications                 | Potential risk  |
| Track weight and BMI;                                                                                                                                                             | Track                 | Lifestyle modification      | Low risk        |
| Generates glucose chart view by daily, weekly, monthly or yearly;<br>Generates histogram to show average glucose of each period;<br>Generates chart view to show weight tendency; | Structured display    | -                           | Low risk        |
| Customised reminders                                                                                                                                                              | Personalized feedback | -                           | Low risk        |
| Manage medications                                                                                                                                                                | Personalized feedback | Medications                 | Potential risk  |

## Health2Sync

| Functions                                                                                      | Functional modules | Diabetes management modules | Risk assessment |
|------------------------------------------------------------------------------------------------|--------------------|-----------------------------|-----------------|
| Track blood glucose;                                                                           | Track              | Monitoring                  | Low risk        |
| Track HbA1c                                                                                    | Track              | Monitoring                  | Potential risk  |
| Track medications and insulin;                                                                 | Track              | Medications                 | Potential risk  |
| Track food;                                                                                    | Track              | Lifestyle modification      | Low risk        |
| Enter note;<br>A quick analysis of your recent blood sugar history in table and graph formats; | Structured display | -                           | Low risk        |
| Invite families to become partners with you on Health2Sync                                     | Communication      | -                           | Low risk        |

## HealthWatch 360

| Functions                                            | Functional modules | Diabetes management modules | Risk assessment |
|------------------------------------------------------|--------------------|-----------------------------|-----------------|
| Track blood glucose and blood pressure;              | Track              | Monitoring                  | Low risk        |
| Track triglycerides                                  | Track              | Monitoring                  | Potential risk  |
| Track medications and insulin;                       | Track              | Medications                 | Potential risk  |
| Track food, calories and nutrients;<br>Track weight; | Track              | Lifestyle modification      | Low risk        |
| Customised note;<br>Trends;                          | Structured display | -                           | Low risk        |
| Food nutrition score, charts and tips;               | General education  | Lifestyle modification      | Low risk        |

|                    |  |  |  |
|--------------------|--|--|--|
| Customised recipe; |  |  |  |
|--------------------|--|--|--|

### Diabetes, blood pressure Diary

| Functions                               | Functional modules    | Diabetes management modules | Risk assessment |
|-----------------------------------------|-----------------------|-----------------------------|-----------------|
| Track blood glucose and blood pressure; | Track                 | Monitoring                  | Low risk        |
| Estimated HbA1c;                        | Track                 | Monitoring                  | Potential risk  |
| Track insulin and oral medication;      | Track                 | Medications                 | Potential risk  |
| Track food;<br>Track weight;            | Track                 | Lifestyle modification      | Low risk        |
| Graph for trends;                       | Structured display    | -                           | Low risk        |
| Set reminders to take medications       | Personalized feedback | Medications                 | Potential risk  |

### Diabetes Glucose Tracker App

| Functions                                                                                                                                                        | Functional modules    | Diabetes management modules | Risk assessment |
|------------------------------------------------------------------------------------------------------------------------------------------------------------------|-----------------------|-----------------------------|-----------------|
| Track blood glucose;                                                                                                                                             | Track                 | Monitoring                  | Low risk        |
| Track HbA1c;                                                                                                                                                     | Track                 | Monitoring                  | Potential risk  |
| Track insulin and oral medication;                                                                                                                               | Track                 | Medications                 | Potential risk  |
| Track food consumption and carbs;<br>Track physical activities;<br>Track weight;                                                                                 | Track                 | Lifestyle modification      | Low risk        |
| Charts and trends;                                                                                                                                               | Structured display    | -                           | Low risk        |
| Set goal;                                                                                                                                                        | Personalized feedback | Monitoring                  | Potential risk  |
| Set reminders to take medications;                                                                                                                               | Personalized feedback | Medications                 | Potential risk  |
| Clinical Study Reference<br>Evan M. Benjamin. Self-Monitoring of Blood Glucose: The Basics. Clinical Diabetes January 2002 20:45-47; doi:10.2337/diaclin.20.1.45 |                       |                             |                 |

### Diabetes Plus

| Functions                                                  | Functional modules    | Diabetes management modules | Risk assessment |
|------------------------------------------------------------|-----------------------|-----------------------------|-----------------|
| Track blood glucose and blood pressure;                    | Track                 | Monitoring                  | Low risk        |
| Calculation of HbA1c;                                      | Track                 | Monitoring                  | Potential risk  |
| Track insulin and medication;                              | Track                 | Medications                 | Potential risk  |
| Track carbohydrates;<br>Track activities;<br>Track weight; | Track                 | Lifestyle modification      | Low risk        |
| Line graphs;<br>Graphical reporting;<br>Notes;             | Structured display    | -                           | Low risk        |
| Customised glucose target range;                           | Personalized feedback | Monitoring                  | Low risk        |

|                                   |                       |             |           |
|-----------------------------------|-----------------------|-------------|-----------|
| Colored indicators;               |                       |             |           |
| Calculation of dosage of insulin; | Personalized feedback | Medications | High risk |

### Diaguard Diabetes

| Functions                                                          | Functional modules    | Diabetes management modules | Risk assessment |
|--------------------------------------------------------------------|-----------------------|-----------------------------|-----------------|
| Track blood glucose and blood pressure;                            | Track                 | Monitoring                  | Low risk        |
| Track HbA1c                                                        | Track                 | Monitoring                  | Potential risk  |
| Track insulin;                                                     | Track                 | Medications                 | Potential risk  |
| Track carbohydrates;                                               | Track                 | Lifestyle modification      | Low risk        |
| Visualize blood glucose in a graph;<br>Detailed logs of your data; | Structured display    | -                           | Low risk        |
| Reminders;                                                         | Personalized feedback | -                           | Potential risk  |
| Bolus calculator;                                                  | Personalized feedback | Medications                 | High risk       |

### Glucose Buddy/Pro

| Functions                                                  | Functional modules    | Diabetes management modules | Risk assessment |
|------------------------------------------------------------|-----------------------|-----------------------------|-----------------|
| Track blood glucose and blood pressure;                    | Track                 | Monitoring                  | Low risk        |
| Track HbA1c                                                | Track                 | Monitoring                  | Potential risk  |
| Track insulin;                                             | Track                 | Medications                 | Potential risk  |
| Track carbohydrates;<br>Track activities;<br>Track weight; | Track                 | Lifestyle modification      | Low risk        |
| Graph of food, activities and blood glucose;<br>Tags;      | Structured display    | -                           | Low risk        |
| Reminders;                                                 | Personalized feedback | -                           | Potential risk  |

### Diabetes Pal App

| Functions                                                                | Functional modules | Diabetes management modules | Risk assessment |
|--------------------------------------------------------------------------|--------------------|-----------------------------|-----------------|
| Track blood glucose and blood pressure;                                  | Track              | Monitoring                  | Low risk        |
| Track HbA1c                                                              | Track              | Monitoring                  | Potential risk  |
| Track medications;                                                       | Track              | Medications                 | Potential risk  |
| Track nutrition;<br>Track activities;<br>Track calories<br>Track weight; | Track              | Lifestyle modification      | Low risk        |
| Charts and graphs;                                                       | Structured display | -                           | Low risk        |



|                           |                       |   |                |
|---------------------------|-----------------------|---|----------------|
| Tags;                     |                       |   |                |
| Notes;                    |                       |   |                |
| Create and achieve goals; | Personalized feedback | - | Potential risk |

### BlueStar Diabetes

| <b>Functions</b>                                                             | <b>Functional modules</b> | <b>Diabetes management modules</b> | <b>Risk assessment</b> |
|------------------------------------------------------------------------------|---------------------------|------------------------------------|------------------------|
| Track blood glucose and blood pressure;                                      | Track                     | Monitoring                         | Low risk               |
| Track HbA1c and cholesterol;                                                 | Track                     | Monitoring                         | Potential risk         |
| Track medications;                                                           | Track                     | Medications                        | Potential risk         |
| Track diet;                                                                  | Track                     | Lifestyle modification             | Low risk               |
| Track activities;                                                            |                           |                                    |                        |
| Charts and graphs;                                                           | Structured display        | -                                  | Low risk               |
| Personalized guidance driven by medication treatment plan and blood glucose; | Personalized feedback     | Medications                        | High risk              |
| Prescribed by a healthcare provider.                                         |                           |                                    |                        |

### iBGStar

| <b>Functions</b>                                                               | <b>Functional modules</b> | <b>Diabetes management modules</b> | <b>Risk assessment</b> |
|--------------------------------------------------------------------------------|---------------------------|------------------------------------|------------------------|
| Track blood glucose;                                                           | Track                     | Monitoring                         | Low risk               |
| Track insulin doses;                                                           | Track                     | Medications                        | Potential risk         |
| Track carb;                                                                    | Track                     | Lifestyle modification             | Low risk               |
| Track activities;                                                              |                           |                                    |                        |
| Trend chart, logbook and statistics;                                           | Structured display        | -                                  | Low risk               |
| Tag of mealtimes;                                                              |                           |                                    |                        |
| Customised notes;                                                              |                           |                                    |                        |
| Color-coded hypo and hyper alerts when blood glucose readings are out of range | Personalized feedback     | Monitoring                         | Low risk               |

### myMedtronic Connect

| <b>Functions</b>                                   | <b>Functional modules</b> | <b>Diabetes management modules</b> | <b>Risk assessment</b> |
|----------------------------------------------------|---------------------------|------------------------------------|------------------------|
| Track blood glucose and infusion site;             | Track                     | Monitoring                         | Low risk               |
| Track insulin doses;                               | Track                     | Medications                        | Potential risk         |
| Graph;                                             | Structured display        | -                                  | Low risk               |
| Set reminders;                                     | Personalized feedback     | -                                  | Low risk               |
| Alarms and alerts;                                 |                           |                                    |                        |
| Video tutorials;                                   | General education         | -                                  | Potential risk         |
| Tips and explanations;                             |                           |                                    |                        |
| Correct infusion set placement and site rotations; |                           |                                    |                        |

|                                                                                  |  |  |  |
|----------------------------------------------------------------------------------|--|--|--|
| Medtronic diabetes blog;                                                         |  |  |  |
| A support tool for a Medtronic insulin pump and continuous glucose monitor (CGM) |  |  |  |

### Glucool Diabetes/Premium

| Functions                                                       | Functional modules    | Diabetes management modules | Risk assessment |
|-----------------------------------------------------------------|-----------------------|-----------------------------|-----------------|
| Track blood glucose and blood pressure;                         | Track                 | Monitoring                  | Low risk        |
| Track HbA1c;                                                    | Track                 | Monitoring                  | Potential risk  |
| Track insulin and medication;                                   | Track                 | Medications                 | Potential risk  |
| Track carbs intake;<br>Track exercise;<br>Track weight and BMI; | Track                 | Lifestyle modification      | Low risk        |
| Graph;<br>Pie charts;<br>Note;                                  | Structured display    | -                           | Low risk        |
| Customised ranges;<br>Remind to check blood glucose;            | Personalized feedback | Monitoring                  | Low risk        |
| Insulin dose calculator;                                        | Personalized feedback | Medications                 | High risk       |

### Glucose Companion/Free

| Functions                                                                                                                                                                                                                                                                                                                                                                                                                                                                                                                                                                        | Functional modules    | Diabetes management modules | Risk assessment |
|----------------------------------------------------------------------------------------------------------------------------------------------------------------------------------------------------------------------------------------------------------------------------------------------------------------------------------------------------------------------------------------------------------------------------------------------------------------------------------------------------------------------------------------------------------------------------------|-----------------------|-----------------------------|-----------------|
| Track blood glucose;                                                                                                                                                                                                                                                                                                                                                                                                                                                                                                                                                             | Track                 | Monitoring                  | Low risk        |
| Track weight;                                                                                                                                                                                                                                                                                                                                                                                                                                                                                                                                                                    | Track                 | Lifestyle modification      | Low risk        |
| Chart;<br>Note;<br>Histogram;<br>Statistics;                                                                                                                                                                                                                                                                                                                                                                                                                                                                                                                                     | Structured display    | -                           | Low risk        |
| Customised target range;                                                                                                                                                                                                                                                                                                                                                                                                                                                                                                                                                         | Personalized feedback | Monitoring                  | Low risk        |
| Customised reminders;                                                                                                                                                                                                                                                                                                                                                                                                                                                                                                                                                            | Personalized feedback | -                           | Potential risk  |
| Insulin dose calculator;                                                                                                                                                                                                                                                                                                                                                                                                                                                                                                                                                         | Personalized feedback | Medications                 | High risk       |
| <p>For the insulin calculation function, it is based this formula: <math>\text{Insulin dosage} = (\text{Blood Sugar} - \text{Goal Blood Sugar}) / \text{Correction Factor} + \text{Carbohydrate} / \text{Carbohydrate Factor}</math>.</p> <p>Please do consult your physician before using it to check if the formula is suitable for you, and ask for your personal Correction Factor, Carbohydrate Factor, Goal Blood Sugar from him/her, and please take note of the unit (mg/dl or mmol/L). The user assumes all responsibility for the numbers inputted and the result.</p> |                       |                             |                 |

### Diabetes in Pregnancy

| Functions | Functional modules | Diabetes management | Risk |
|-----------|--------------------|---------------------|------|
|-----------|--------------------|---------------------|------|

|                                               |                    | <b>modules</b>         | <b>assessment</b> |
|-----------------------------------------------|--------------------|------------------------|-------------------|
| Track blood glucose;                          | Track              | Monitoring             | Low risk          |
| Track food, carbs and calorie;                | Track              | Lifestyle modification | Low risk          |
| Track insulin and medications;                | Track              | Medications            | Potential risk    |
| Charts;                                       | Structured display | -                      | Low risk          |
| Information for food, nutrition and exercises | General education  | Lifestyle modification | Low risk          |
| Information for medications                   | General education  | Medications            | Potential risk    |

## Glooko

| <b>Functions</b>                                 | <b>Functional modules</b> | <b>Diabetes management modules</b> | <b>Risk assessment</b> |
|--------------------------------------------------|---------------------------|------------------------------------|------------------------|
| Track blood glucose and blood pressure;          | Track                     | Monitoring                         | Low risk               |
| Track insulin;                                   | Track                     | Medications                        | Potential risk         |
| Track carbs;<br>Track exercise;<br>Track weight; | Track                     | Lifestyle modification             | Low risk               |
| Trends;<br>Graph;<br>Statistics;                 | Structured display        | -                                  | Low risk               |
| Customised reminders                             | Personalized feedback     | -                                  | Potential risk         |
| FDA 510(k) cleared platform                      |                           |                                    |                        |

## Carburetor

| <b>Functions</b>                | <b>Functional modules</b> | <b>Diabetes management modules</b> | <b>Risk assessment</b> |
|---------------------------------|---------------------------|------------------------------------|------------------------|
| Track blood glucose;            | Track                     | Monitoring                         | Low risk               |
| Track HbA1c                     | Track                     | Monitoring                         | Potential risk         |
| Track medications;              | Track                     | Medications                        | Potential risk         |
| Track carbs;<br>Track exercise; | Track                     | Lifestyle modification             | Low risk               |
| Statistics;                     | Structured display        | -                                  | Low risk               |
| Food nutrition;                 | General education         | Lifestyle modification             | Low risk               |

## Diabetes:360

| <b>Functions</b>                       | <b>Functional modules</b> | <b>Diabetes management modules</b> | <b>Risk assessment</b> |
|----------------------------------------|---------------------------|------------------------------------|------------------------|
| Track blood glucose;                   | Track                     | Monitoring                         | Low risk               |
| Track insulin;                         | Track                     | Medications                        | Potential risk         |
| Track carbohydrate;<br>Track exercise; | Track                     | Lifestyle modification             | Low risk               |
| Graphs;                                | Structured display        | -                                  | Low risk               |

|                          |                       |             |                |
|--------------------------|-----------------------|-------------|----------------|
| Customised reminder      | Personalized feedback | -           | Potential risk |
| Calculate insulin dosing | Personalized feedback | Medications | High risk      |

## ACCU-CHEK

| Functions                                                                                                                                     | Functional modules    | Diabetes management modules | Risk assessment |
|-----------------------------------------------------------------------------------------------------------------------------------------------|-----------------------|-----------------------------|-----------------|
| Track blood glucose and blood pressure;                                                                                                       | Track                 | Monitoring                  | Low risk        |
| Track insulin and medications;                                                                                                                | Track                 | Medications                 | Potential risk  |
| Track meals, size, carbs and calories;<br>Track exercise;<br>Track weight;                                                                    | Track                 | Lifestyle modification      | Low risk        |
| Trends;<br>Graphs;                                                                                                                            | Structured display    | -                           | Low risk        |
| Reminders for blood glucose testing;                                                                                                          | Personalized feedback | Monitoring                  | Low risk        |
| Bolus insulin advice;                                                                                                                         | Personalized feedback | Medications                 | High risk       |
| The ACCU-CHEK Bolus Advisor feature must be activated by your healthcare professional with appropriate information needed for set-up and use. |                       |                             |                 |

## Gestational Diabetes Manager

| Functions                                                                 | Functional modules | Diabetes management modules | Risk assessment |
|---------------------------------------------------------------------------|--------------------|-----------------------------|-----------------|
| Track blood glucose;                                                      | Track              | Monitoring                  | Low risk        |
| Track ketones;                                                            | Track              | Monitoring                  | Potential risk  |
| Track insulin;                                                            | Track              | Medications                 | Potential risk  |
| Track carbohydrate intake;<br>Track exercise;<br>Track water consumption; | Track              | Lifestyle modification      | Low risk        |
| Charts;<br>Graphs;                                                        | Structured display | -                           | Low risk        |
| Food database with nutrition and calorie information;                     | General education  | Lifestyle modification      | Low risk        |

## Sugar Sense

| Functions                                              | Functional modules | Diabetes management modules | Risk assessment |
|--------------------------------------------------------|--------------------|-----------------------------|-----------------|
| Track blood glucose;                                   | Track              | Monitoring                  | Low risk        |
| Track nutrition;<br>Track activities;<br>Track weight; | Track              | Lifestyle modification      | Low risk        |
| Charts;<br>Trends;<br>Graphs;                          | Structured display | -                           | Low risk        |

|                                                                                                                                        |                   |   |          |
|----------------------------------------------------------------------------------------------------------------------------------------|-------------------|---|----------|
| Tips on improving glycemic control;<br>Diabetes health guide;                                                                          | General education | - | Low risk |
| Diabetes communities                                                                                                                   | Communication     | - | Low risk |
| This software is intended for informational and educational use only. Please consult your healthcare provider for any health concerns. |                   |   |          |

### mySugr Junior

| Functions                                                                | Functional modules    | Diabetes management modules | Risk assessment |
|--------------------------------------------------------------------------|-----------------------|-----------------------------|-----------------|
| Track blood glucose;                                                     | Track                 | Monitoring                  | Low risk        |
| Track medications and insulin;                                           | Track                 | Medications                 | Potential risk  |
| Track carbs;                                                             | Track                 | Lifestyle modification      | Low risk        |
| Goals and feedback                                                       | Personalized feedback | Monitoring                  | Low risk        |
| Communication between children living with diabetes and their caregivers | Communication         | -                           | Low risk        |

### Easy Diabetes

| Functions                       | Functional modules    | Diabetes management modules | Risk assessment |
|---------------------------------|-----------------------|-----------------------------|-----------------|
| Track blood glucose;            | Track                 | Monitoring                  | Low risk        |
| Track ketones;                  | Track                 | Monitoring                  | Potential risk  |
| Track insulin;                  | Track                 | Medications                 | Potential risk  |
| Track carbohydrate;             | Track                 | Lifestyle modification      | Low risk        |
| Notes;<br>Charts;               | Structured display    | -                           | Low risk        |
| Customised targets and feedback | Personalized feedback | Monitoring                  | Low risk        |

### GlucoSweet

| Functions                        | Functional modules    | Diabetes management modules | Risk assessment |
|----------------------------------|-----------------------|-----------------------------|-----------------|
| Track blood glucose;             | Track                 | Monitoring                  | Low risk        |
| Track carbohydrate;              | Track                 | Lifestyle modification      | Low risk        |
| Track medications and insulin;   | Track                 | Medications                 | Potential risk  |
| Graphs and chart;<br>Statistics; | Structured display    | -                           | Low risk        |
| Customised ranges and feedback;  | Personalized feedback | Monitoring                  | Low risk        |
| Customised reminders;            | Personalized feedback | -                           | Potential risk  |

### Diabetes Pedometer with Glucose

| Functions                               | Functional modules | Diabetes management modules | Risk assessment |
|-----------------------------------------|--------------------|-----------------------------|-----------------|
| Track blood glucose and blood pressure; | Track              | Monitoring                  | Low risk        |

|                                                            |                       |                        |                |
|------------------------------------------------------------|-----------------------|------------------------|----------------|
| Track activity;<br>Carb counting;<br>Track weight and BMI; | Track                 | Lifestyle modification | Low risk       |
| Track insulin;                                             | Track                 | Medications            | Potential risk |
| Graphs and chart;                                          | Structured display    | -                      | Low risk       |
| Medication reminders;                                      | Personalized feedback | Medications            | Potential risk |

### Diabetes Recorder/Free

| <b>Functions</b>                                        | <b>Functional modules</b> | <b>Diabetes management modules</b> | <b>Risk assessment</b> |
|---------------------------------------------------------|---------------------------|------------------------------------|------------------------|
| Track blood glucose and blood pressure;                 | Track                     | Monitoring                         | Low risk               |
| Track HbA1c;                                            | Track                     | Monitoring                         | Potential risk         |
| Track insulin;                                          | Track                     | Medications                        | Potential risk         |
| Track carbohydrate;<br>Track movement;<br>Track weight; | Track                     | Lifestyle modification             | Low risk               |
| Graphs and chart;                                       | Structured display        | -                                  | Low risk               |
| Set alarms to measure;                                  | Personalized feedback     | Monitoring                         | Low risk               |

### Diabetes studio

| <b>Functions</b>          | <b>Functional modules</b> | <b>Diabetes management modules</b> | <b>Risk assessment</b> |
|---------------------------|---------------------------|------------------------------------|------------------------|
| Track blood glucose;      | Track                     | Monitoring                         | Low risk               |
| Track moods and emotions; | Track                     | Psychosocial care                  | Low risk               |
| Tags;<br>Charts;          | Structured display        | -                                  | Low risk               |
| Customised reminders;     | Personalized feedback     | -                                  | Potential risk         |
| Insulin calculator;       | Personalized feedback     | Medications                        | High risk              |

### DiabetesConnect

| <b>Functions</b>                                   | <b>Functional modules</b> | <b>Diabetes management modules</b> | <b>Risk assessment</b> |
|----------------------------------------------------|---------------------------|------------------------------------|------------------------|
| Track blood glucose;                               | Track                     | Monitoring                         | Low risk               |
| Track insulin and medications;                     | Track                     | Medications                        | Potential risk         |
| Track meals and carbohydrate;<br>Track activities; | Track                     | Lifestyle modification             | Low risk               |
| Graphs and statistics;<br>Pie chart;               | Structured display        | -                                  | Low risk               |
| Set reminders;                                     | Personalized feedback     | Monitoring                         | Low risk               |

## BlueLoop

| Functions                                     | Functional modules    | Diabetes management modules | Risk assessment |
|-----------------------------------------------|-----------------------|-----------------------------|-----------------|
| Track blood glucose;                          | Track                 | Monitoring                  | Low risk        |
| Track carbohydrates;                          | Track                 | Lifestyle modification      | Low risk        |
| Track medications and insulin;                | Track                 | Medications                 | Potential risk  |
| Notes;                                        | Structured display    | -                           | Low risk        |
| Instant notifications are sent as enter data; | Personalized feedback | -                           | Potential risk  |

## GlucoSuccess

| Functions                                                                                                                                                | Functional modules    | Diabetes management modules           | Risk assessment |
|----------------------------------------------------------------------------------------------------------------------------------------------------------|-----------------------|---------------------------------------|-----------------|
| Track blood glucose;                                                                                                                                     | Track                 | Monitoring                            | Low risk        |
| Track diet, sugar, carbohydrates and calories;<br>Track steps, activity duration and intensity;<br>Track body weight and waist size;                     | Track                 | Lifestyle modification                | Low risk        |
| Provide an integrated view of your health behaviors<br>Compare foods you ate and activity levels before in-range/out-of-range blood glucose measurements | Structured display    | -                                     | Low risk        |
| Receive Notifications about:<br>- Logging your blood glucose<br>- Recording diet information through LoseIt                                              | Personalized feedback | Monitoring;<br>Lifestyle modification | Low risk        |
| Diabetes lifestyle education from ADA website.                                                                                                           | General education     | Lifestyle modification                | Low risk        |
| A research study.                                                                                                                                        |                       |                                       |                 |

## MyGlycemia

| Functions                       | Functional modules    | Diabetes management modules | Risk assessment |
|---------------------------------|-----------------------|-----------------------------|-----------------|
| Track blood glucose;            | Track                 | Monitoring                  | Low risk        |
| Table, graph and charts;        | Structured display    | -                           | Low risk        |
| Alarm to measure blood glucose; | Personalized feedback | Monitoring                  | Low risk        |
| Avoid hypoglycemia;             | General education     | Complication prevention     | Potential risk  |

## GoMeals

| Functions                                                                                    | Functional modules | Diabetes management modules | Risk assessment |
|----------------------------------------------------------------------------------------------|--------------------|-----------------------------|-----------------|
| Track blood glucose;                                                                         | Track              | Monitoring                  | Low risk        |
| Track food, nutrition, carbs and calorie;<br>Track activities and calories;<br>Track weight; | Track              | Lifestyle modification      | Low risk        |

|                                 |                    |                        |          |
|---------------------------------|--------------------|------------------------|----------|
| Charts;<br>Tags;                | Structured display | -                      | Low risk |
| Database for food and nutrition | General education  | Lifestyle modification | Low risk |

### Diabetes Personal Calculator

| Functions                                                                                      | Functional modules    | Diabetes management modules | Risk assessment |
|------------------------------------------------------------------------------------------------|-----------------------|-----------------------------|-----------------|
| Track blood glucose;                                                                           | Track                 | Monitoring                  | Low risk        |
| Track insulin;                                                                                 | Track                 | Medications                 | Potential risk  |
| Track meals and food items, carbohydrate intake;                                               | Track                 | Lifestyle modification      | Low risk        |
| Bolus insulin calculator;                                                                      | Personalized feedback | Medications                 | High risk       |
| Diabetes Personal Calculator must only be used as a guide and on the advice of your physician. |                       |                             |                 |

### Healthgoal360

| Functions                                                  | Functional modules | Diabetes management modules | Risk assessment |
|------------------------------------------------------------|--------------------|-----------------------------|-----------------|
| Track blood glucose;                                       | Track              | Monitoring                  | Low risk        |
| Track HbA1c and lab results;                               | Track              | Monitoring                  | Potential risk  |
| Track medications and insulin;                             | Track              | Medications                 | Potential risk  |
| Track steps and calories;<br>Track diets;<br>Track weight; | Track              | Lifestyle modification      | Low risk        |
| Summary dashboard;<br>Charts;                              | Structured display | -                           | Low risk        |

### Diabetes Assistant

| Functions                        | Functional modules    | Diabetes management modules | Risk assessment |
|----------------------------------|-----------------------|-----------------------------|-----------------|
| Track blood glucose;             | Track                 | Monitoring                  | Low risk        |
| Track meals;                     | Track                 | Lifestyle modification      | Low risk        |
| Charts;                          | Structured display    | -                           | Low risk        |
| Customised targets and feedback; | Personalized feedback | Monitoring                  | Low risk        |
| Customised reminders;            | Personalized feedback | -                           | Potential risk  |

### Diabetes Diary

| Functions                  | Functional modules | Diabetes management modules | Risk assessment |
|----------------------------|--------------------|-----------------------------|-----------------|
| Track blood glucose;       | Track              | Monitoring                  | Low risk        |
| Track carbohydrate intake; | Track              | Lifestyle modification      | Low risk        |
| Track insulin;             | Track              | Medications                 | Potential risk  |



|                  |                    |   |          |
|------------------|--------------------|---|----------|
| Graphs;<br>Tags; | Structured display | - | Low risk |
|------------------|--------------------|---|----------|

### Diabetes:M

| Functions                 | Functional modules    | Diabetes management modules | Risk assessment |
|---------------------------|-----------------------|-----------------------------|-----------------|
| Track blood glucose;      | Track                 | Monitoring                  | Low risk        |
| Charts;<br>Statistics;    | Structured display    | -                           | Low risk        |
| Insulin bolus calculator; | Personalized feedback | Medications                 | High risk       |

### OnTrack Diabetes

| Functions                    | Functional modules    | Diabetes management modules | Risk assessment |
|------------------------------|-----------------------|-----------------------------|-----------------|
| Track blood glucose;         | Track                 | Monitoring                  | Low risk        |
| Track HbA1c;                 | Track                 | Monitoring                  | Potential risk  |
| Track food;<br>Track weight; | Track                 | Lifestyle modification      | Low risk        |
| Graphs and chart;            | Structured display    | -                           | Low risk        |
| Set reminders;               | Personalized feedback | Monitoring                  | Low risk        |

### Diabetes Management

| Functions                               | Functional modules | Diabetes management modules | Risk assessment |
|-----------------------------------------|--------------------|-----------------------------|-----------------|
| Track blood glucose and blood pressure; | Track              | Monitoring                  | Low risk        |
| Track insulin;                          | Track              | Medications                 | Potential risk  |
| Track carbohydrate;<br>Track movement;  | Track              | Lifestyle modification      | Low risk        |
| Finding diabetes doctors                | Communications     | -                           | Potential risk  |
| News for diabetes                       | General education  | -                           | Potential risk  |

### Dexcom Follow/Dexcom Share2

| Functions                            | Functional modules    | Diabetes management modules | Risk assessment |
|--------------------------------------|-----------------------|-----------------------------|-----------------|
| Track blood glucose;                 | Track                 | Monitoring                  | Low risk        |
| Graphs and trends;                   | Structured display    | -                           | Low risk        |
| Customised glucose range and alarms; | Personalized feedback | Monitoring                  | Low risk        |
| Share with families;                 | Communication         | -                           | Low risk        |
| Dexcom CGM companion                 |                       |                             |                 |

### mylife SiDiary

| <b>Functions</b>                        | <b>Functional modules</b> | <b>Diabetes management modules</b> | <b>Risk assessment</b> |
|-----------------------------------------|---------------------------|------------------------------------|------------------------|
| Track blood glucose and blood pressure; | Track                     | Monitoring                         | Low risk               |
| Track carbohydrates;                    | Track                     | Lifestyle modification             | Low risk               |
| Track medications;                      | Track                     | Medications                        | Potential risk         |
| Statistic graphs;<br>Trend analysis;    | Structured display        | -                                  | Low risk               |

### dbees.com

| <b>Functions</b>               | <b>Functional modules</b> | <b>Diabetes management modules</b> | <b>Risk assessment</b> |
|--------------------------------|---------------------------|------------------------------------|------------------------|
| Track blood glucose;           | Track                     | Monitoring                         | Low risk               |
| Track diet;                    | Track                     | Lifestyle modification             | Low risk               |
| Track insulin and medications; | Track                     | Medications                        | Potential risk         |
| Graphs;                        | Structured display        | -                                  | Low risk               |

### AgaMatrix Diabetes Manager

| <b>Functions</b>               | <b>Functional modules</b> | <b>Diabetes management modules</b> | <b>Risk assessment</b> |
|--------------------------------|---------------------------|------------------------------------|------------------------|
| Track blood glucose;           | Track                     | Monitoring                         | Low risk               |
| Track carbs;<br>Track weight;  | Track                     | Lifestyle modification             | Low risk               |
| Track insulin and medications; | Track                     | Medications                        | Potential risk         |
| Trends and logbook;            | Structured display        | -                                  | Low risk               |

### Best Diabetes Control

| <b>Functions</b>                                                                                                            | <b>Functional modules</b> | <b>Diabetes management modules</b> | <b>Risk assessment</b> |
|-----------------------------------------------------------------------------------------------------------------------------|---------------------------|------------------------------------|------------------------|
| Track blood glucose and blood pressure;                                                                                     | Track                     | Monitoring                         | Low risk               |
| Track food, categories, carbs and nutrition;<br>Track exercise and calories;<br>Track weight and BMI;<br>Track water intake | Track                     | Lifestyle modification             | Low risk               |
| Track insulin and medications;                                                                                              | Track                     | Medications                        | Potential risk         |
| Trends and graphs;<br>Tags;                                                                                                 | Structured display        | -                                  | Low risk               |

### diasend

| <b>Functions</b>     | <b>Functional modules</b> | <b>Diabetes management modules</b> | <b>Risk assessment</b> |
|----------------------|---------------------------|------------------------------------|------------------------|
| Track blood glucose; | Track                     | Monitoring                         | Low risk               |

|                               |                    |                        |                |
|-------------------------------|--------------------|------------------------|----------------|
| Track activity;<br>Track carb | Track              | Lifestyle modification | Low risk       |
| Track insulin;                | Track              | Medications            | Potential risk |
| Landscape mode;               | Structured display | -                      | Low risk       |

### SiDiary Diabetes Management

| Functions                               | Functional modules | Diabetes management modules | Risk assessment |
|-----------------------------------------|--------------------|-----------------------------|-----------------|
| Track blood glucose and blood pressure; | Track              | Monitoring                  | Low risk        |
| Track carbohydrates;<br>Track weight;   | Track              | Lifestyle modification      | Low risk        |
| Track insulin and medications;          | Track              | Medications                 | Potential risk  |
| Trends and statistics;                  | Structured display | -                           | Low risk        |

### Diabetes Insulin Calculator

| Functions            | Functional modules    | Diabetes management modules | Risk assessment |
|----------------------|-----------------------|-----------------------------|-----------------|
| Track blood glucose; | Track                 | Monitoring                  | Low risk        |
| Track food;          | Track                 | Lifestyle modification      | Low risk        |
| Insulin calculator   | Personalized feedback | Medications                 | High risk       |

### Diabetes Diary

| Functions            | Functional modules    | Diabetes management modules | Risk assessment |
|----------------------|-----------------------|-----------------------------|-----------------|
| Track blood glucose; | Track                 | Monitoring                  | Low risk        |
| Track insulin;       | Track                 | Medications                 | Potential risk  |
| Custom notes         | Structured display    | -                           | Low risk        |
| Insulin calculator   | Personalized feedback | Medications                 | High risk       |

### Diabetes BP Health Tracker App

| Functions                                     | Functional modules | Diabetes management modules | Risk assessment |
|-----------------------------------------------|--------------------|-----------------------------|-----------------|
| Track blood glucose and blood pressure;       | Track              | Monitoring                  | Low risk        |
| Track food;<br>Track weight and body metrics; | Track              | Lifestyle modification      | Low risk        |
| Track medications and insulin;                | Track              | Medications                 | Potential risk  |
| Graphs;                                       | Structured display | -                           | Low risk        |

### Gluco Share

| Functions | Functional modules | Diabetes management modules | Risk assessment |
|-----------|--------------------|-----------------------------|-----------------|
|-----------|--------------------|-----------------------------|-----------------|

|                                |                       |            |          |
|--------------------------------|-----------------------|------------|----------|
| Track blood glucose;           | Track                 | Monitoring | Low risk |
| Graphs;                        | Structured display    | -          | Low risk |
| Customised goals and feedback; | Personalized feedback | Monitoring | Low risk |
| Share with other users;        | Communication         | -          | Low risk |

### Welkin for Diabetes

| Functions                                   | Functional modules | Diabetes management modules | Risk assessment |
|---------------------------------------------|--------------------|-----------------------------|-----------------|
| Track blood glucose;                        | Track              | Monitoring                  | Low risk        |
| Track meals;                                | Track              | Lifestyle modification      | Low risk        |
| Connect with a professional diabetes coach; | Communication      | -                           | Potential risk  |

### True Manager Air Logbook

| Functions                                                                                                                                                                                                                                                                                                                                                                                                                                 | Functional modules    | Diabetes management modules | Risk assessment |
|-------------------------------------------------------------------------------------------------------------------------------------------------------------------------------------------------------------------------------------------------------------------------------------------------------------------------------------------------------------------------------------------------------------------------------------------|-----------------------|-----------------------------|-----------------|
| Track blood glucose;                                                                                                                                                                                                                                                                                                                                                                                                                      | Track                 | Monitoring                  | Low risk        |
| Logbook and tag;                                                                                                                                                                                                                                                                                                                                                                                                                          | Structured display    | -                           | Low risk        |
| Set target ranges for blood glucose;                                                                                                                                                                                                                                                                                                                                                                                                      | Personalized feedback | Monitoring                  | Potential risk  |
| <p>True Metrix Air Blood Glucose wireless meter companion.</p> <p>Target Range (mg/dL) YELLOW = Above Normal &gt;130 GREEN = Normal 70-130 RED = Hypoglycemic &lt;70.</p> <p>This product is intended for personal use to support better diabetes management without providing specific treatment or treatment suggestions. It is not for diagnostic use. Consult a Doctor or Healthcare Professional before changing treatment plan.</p> |                       |                             |                 |

### Diabetic Connect

| Functions                       | Functional modules | Diabetes management modules | Risk assessment |
|---------------------------------|--------------------|-----------------------------|-----------------|
| Track blood glucose;            | Track              | Monitoring                  | Low risk        |
| Track mood;                     | Track              | Psychosocial care           | Low risk        |
| Community of diabetes patients; | Communication      | -                           | Low risk        |

### Dexcom G5 Mobile

| Functions                            | Functional modules    | Diabetes management modules | Risk assessment |
|--------------------------------------|-----------------------|-----------------------------|-----------------|
| Track blood glucose;                 | Track                 | Monitoring                  | Low risk        |
| Trends;                              | Structured display    | -                           | Low risk        |
| Set alerts for glucose               | Personalized feedback | Monitoring                  | Potential risk  |
| Continuous glucose monitoring system |                       |                             |                 |

### Sugar Streak

| Functions | Functional modules | Diabetes management modules | Risk assessment |
|-----------|--------------------|-----------------------------|-----------------|
|-----------|--------------------|-----------------------------|-----------------|

|                                                 |                       |            |                |
|-------------------------------------------------|-----------------------|------------|----------------|
| Track blood glucose;                            | Track                 | Monitoring | Low risk       |
| Predicted HbA1c;                                | Track                 | Monitoring | Potential risk |
| Graphs;                                         | Structured display    | -          | Low risk       |
| Set goals and rewards;<br>Reminders to monitor; | Personalized feedback | Monitoring | Potential risk |

## Bant

| <b>Functions</b>       | <b>Functional modules</b> | <b>Diabetes management modules</b> | <b>Risk assessment</b> |
|------------------------|---------------------------|------------------------------------|------------------------|
| Track blood glucose;   | Track                     | Monitoring                         | Low risk               |
| Graphs;                | Structured display        | -                                  | Low risk               |
| Share through Twitter; | Communication             | -                                  | Low risk               |

## ditto Glucose Logbook

| <b>Functions</b>                | <b>Functional modules</b> | <b>Diabetes management modules</b> | <b>Risk assessment</b> |
|---------------------------------|---------------------------|------------------------------------|------------------------|
| Track blood glucose;            | Track                     | Monitoring                         | Low risk               |
| Graphs;<br>Notes and tags;      | Structured display        | -                                  | Low risk               |
| Customised blood glucose range; | Personalized feedback     | Monitoring                         | Low risk               |

## Dnurse

| <b>Functions</b>       | <b>Functional modules</b> | <b>Diabetes management modules</b> | <b>Risk assessment</b> |
|------------------------|---------------------------|------------------------------------|------------------------|
| Track blood glucose;   | Track                     | Monitoring                         | Low risk               |
| Graphs and statistics; | Structured display        | -                                  | Low risk               |
| Customised reminders;  | Personalized feedback     | Monitoring                         | Low risk               |

## Blood Glucose Tracker

| <b>Functions</b>                 | <b>Functional modules</b> | <b>Diabetes management modules</b> | <b>Risk assessment</b> |
|----------------------------------|---------------------------|------------------------------------|------------------------|
| Track blood glucose;             | Track                     | Monitoring                         | Low risk               |
| Graphs;                          | Structured display        | -                                  | Low risk               |
| Customised reminders to monitor; | Personalized feedback     | Monitoring                         | Low risk               |

## Diabetes App

| <b>Functions</b>     | <b>Functional modules</b> | <b>Diabetes management modules</b> | <b>Risk assessment</b> |
|----------------------|---------------------------|------------------------------------|------------------------|
| Track blood glucose; | Track                     | Monitoring                         | Low risk               |
| Track food;          | Track                     | Lifestyle modification             | Low risk               |
| Graphs;              | Structured display        | -                                  | Low risk               |

## MiniMed Connect

| Functions                                                                               | Functional modules | Diabetes management modules | Risk assessment |
|-----------------------------------------------------------------------------------------|--------------------|-----------------------------|-----------------|
| Track blood glucose;                                                                    | Track              | Monitoring                  | Low risk        |
| Track insulin;                                                                          | Track              | Medications                 | Potential risk  |
| Graphs;                                                                                 | Structured display | -                           | Low risk        |
| MiniMed Connect links your MiniMed pump and continuous glucose monitoring (CGM) sensor. |                    |                             |                 |

## Lazysugar

| Functions                         | Functional modules    | Diabetes management modules | Risk assessment |
|-----------------------------------|-----------------------|-----------------------------|-----------------|
| Track blood glucose;              | Track                 | Monitoring                  | Low risk        |
| Feedback and rewards of checking; | Personalized feedback | Monitoring                  | Low risk        |

## Diabetes

| Functions                   | Functional modules | Diabetes management modules | Risk assessment |
|-----------------------------|--------------------|-----------------------------|-----------------|
| Track blood glucose;        | Track              | Monitoring                  | Low risk        |
| Trends and graphs;<br>Tags; | Structured display | -                           | Low risk        |

## Gluco Logger

| Functions            | Functional modules | Diabetes management modules | Risk assessment |
|----------------------|--------------------|-----------------------------|-----------------|
| Track blood glucose; | Track              | Monitoring                  | Low risk        |
| Trends;              | Structured display | -                           | Low risk        |

## Gmate SMART

| Functions            | Functional modules | Diabetes management modules | Risk assessment |
|----------------------|--------------------|-----------------------------|-----------------|
| Track blood glucose; | Track              | Monitoring                  | Low risk        |
| Graphs;              | Structured display | -                           | Low risk        |

## Glucose Recorder/Free

| Functions            | Functional modules | Diabetes management modules | Risk assessment |
|----------------------|--------------------|-----------------------------|-----------------|
| Track blood glucose; | Track              | Monitoring                  | Low risk        |
| Graphs;              | Structured display | -                           | Low risk        |

## Diabetes Importer by mySugr

| <b>Functions</b>     | <b>Functional modules</b> | <b>Diabetes management modules</b> | <b>Risk assessment</b> |
|----------------------|---------------------------|------------------------------------|------------------------|
| Track blood glucose; | Track                     | Monitoring                         | Low risk               |
| Graphs;              | Structured display        | -                                  | Low risk               |

## References

1. de RM, Kim J, Jing Y, Khadra M, Nanan R. A systematic review on incentive-driven mobile health technology: As used in diabetes management. *J Telemed Telecare* 2016 Feb 16. PMID:26888421
2. Basilico A, Marceglia S, Bonacina S, Pinciroli F. Advising patients on selecting trustful apps for diabetes self-care. *Comput Biol Med* 2016 Apr 01; 71:86-96. PMID:26897071
3. Riazi H, Larijani B, Langarizadeh M, Shahmoradi L. Managing diabetes mellitus using information technology: a systematic review. *J Diabetes Metab Disord* 2015; 14:49. PMID:26075190
4. Williams JP, Schroeder D. Popular Glucose Tracking Apps and Use of mHealth by Latinos With Diabetes: Review. *JMIR Mhealth Uhealth* 2015; 3(3):e84. PMID:26307533
5. Lewis TL, Wyatt JC. mHealth and mobile medical Apps: a framework to assess risk and promote safer use. *J Med Internet Res* 2014 Sept 15; 16(9):e210. PMID:25223398
6. El-Gayar O, Timsina P, Nawar N, Eid W. Mobile applications for diabetes self-management: status and potential. *J Diabetes Sci Technol* 2013; 7(1):247-62. PMID:23439183
7. El-Gayar O, Timsina P, Nawar N, Eid W. A systematic review of IT for diabetes self-management: are we there yet?. *Int J Med Inform* 2013 Aug; 82(8):637-52. PMID:23792137
8. Årsand E, Frøisland DH, Skrøvseth SO, Chomutare T, Tatara N, Hartvigsen G, Tufano JT. Mobile health applications to assist patients with diabetes: lessons learned and design implications. *J Diabetes Sci Technol* 2012 Sept; 6(5):1197-206. PMID:23063047
9. Demidowich AP, Lu K, Tamler R, Bloomgarden Z. An evaluation of diabetes self-management applications for Android smartphones. *J Telemed Telecare* 2012 Jun; 18(4):235-8. PMID:22604278
10. Holtz B, Lauckner C. Diabetes management via mobile phones: a systematic review. *Telemed J E Health* 2012 Apr; 18(3):175-84. PMID:22356525
11. Liang X, Wang Q, Yang X, Cao J, Chen J, Mo X, Huang J, Wang L, Gu D. Effect of mobile phone intervention for diabetes on glycaemic control: a meta-analysis. *Diabet Med* 2011 Apr; 28(4):455-63. PMID:21392066
12. Rao A, Hou P, Golnik T, Flaherty J, Vu S. Evolution of data management tools for managing self-monitoring of blood glucose results: a survey of iPhone applications. *J Diabetes Sci Technol* 2010 Jul; 4(4):949-57. PMID:20663461
13. American Diabetes Association. Standards of medical care in diabetes-2017. *Diabetes Care* 2017 Jan;40(Suppl 1):S1-S132. URL: [http://professional.diabetes.org/sites/professional.diabetes.org/files/media/dc\\_40\\_s1\\_final.pdf](http://professional.diabetes.org/sites/professional.diabetes.org/files/media/dc_40_s1_final.pdf)
14. Food and Drug Administration, Federal Communications Commission, The Office of the National Coordinator for Health Information Technology. 2014 Apr. FDASIA health IT report: proposed strategy and recommendations for a risk-based framework. URL:<http://www.fda.gov/downloads/AboutFDA/CentersOffices/OfficeofMedicalProductsandTobacco/CDRH/CDRHReports/UCM391521.pdf>
