# Supplementary material for: Mobile App-Based Interventions to Support Diabetes Self-Management: A Systematic Review of Randomized Controlled Trials to Identify Functions Associated with Glycemic Efficacy
Source: PubMed Central journal article supplement (PMC5373677; doi:10.2196/mhealth.6522), 2017-03-14
Supplement: mhealth_v5i3e35_app5.pdf [file mhealth_v5i3e35_app5.pdf]

## Multimedia Appendix 6 Funnel plot

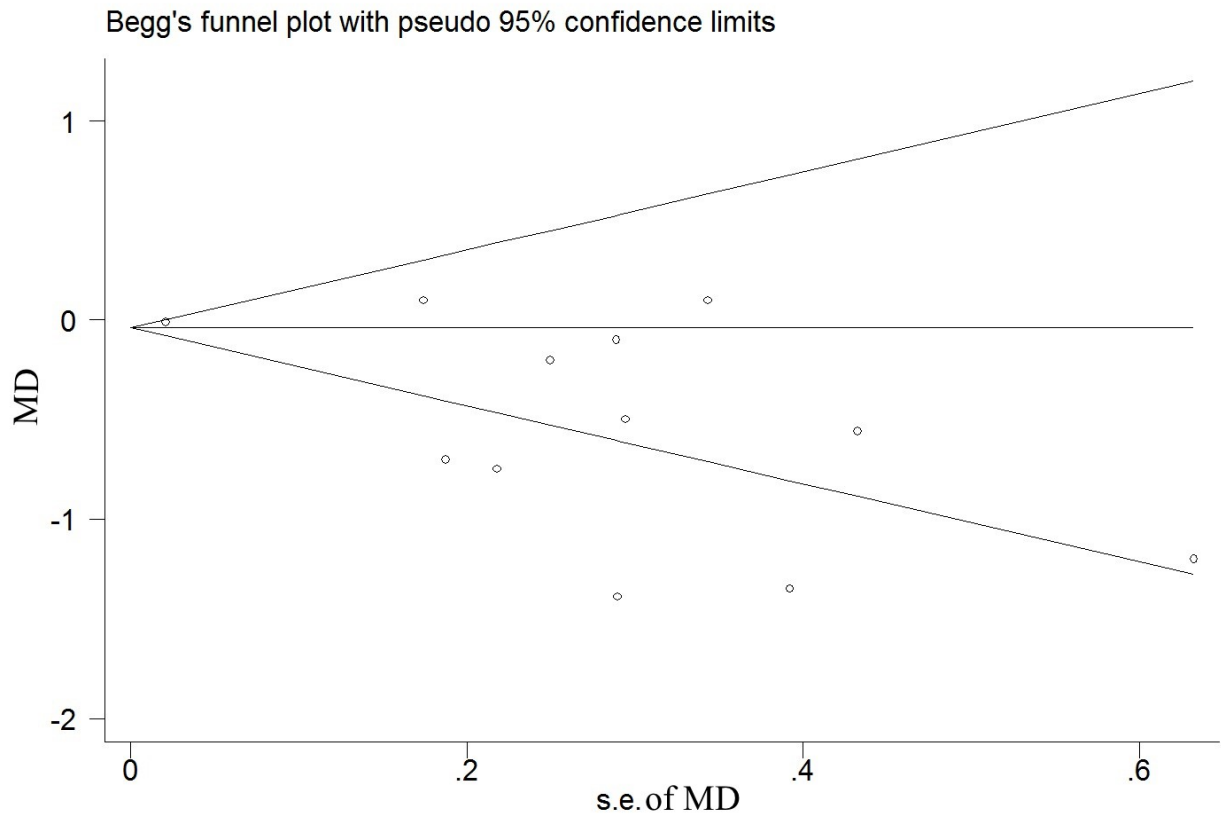

s.e., standard error. MD, Mean Difference.
