# Supplementary material for: Mobile App-Based Interventions to Support Diabetes Self-Management: A Systematic Review of Randomized Controlled Trials to Identify Functions Associated with Glycemic Efficacy
Source: PubMed Central journal article supplement (PMC5373677; doi:10.2196/mhealth.6522), 2017-03-14

# Multimedia Appendix 8 Meta-analyses for adverse events

## A Severe hypoglycemia

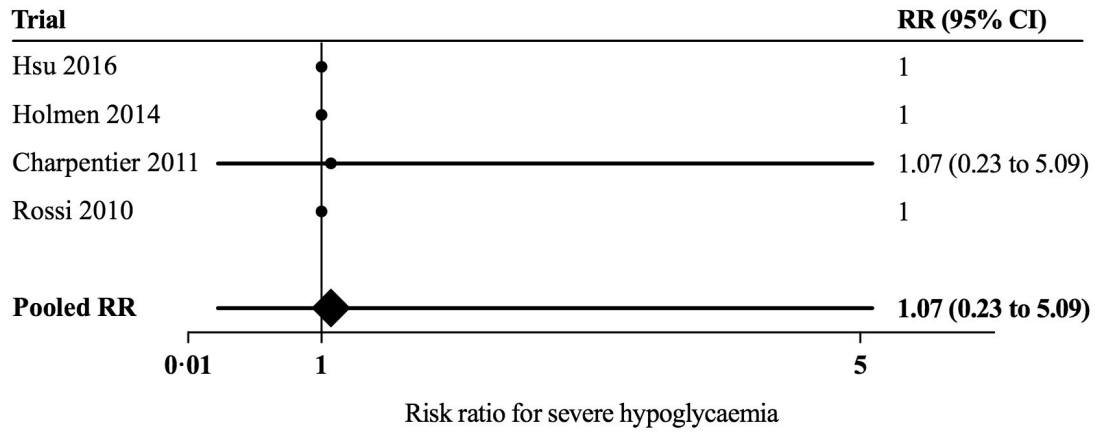

## B Overall hypoglycemia

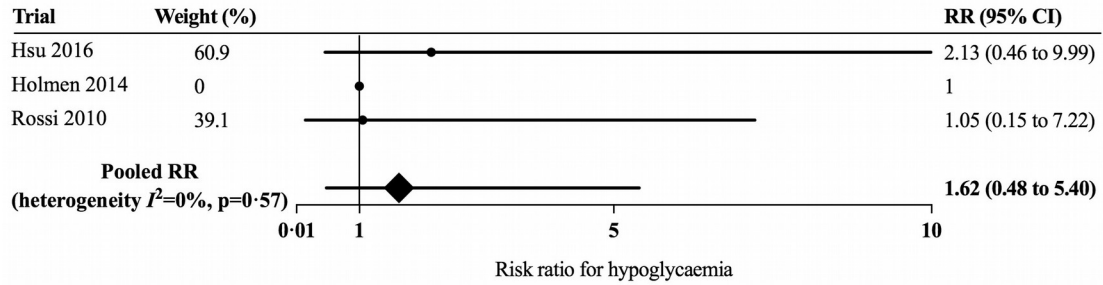

Supplement: mhealth_v5i3e35_app7.pdf [file mhealth_v5i3e35_app7.pdf]
