# Supplementary material for: Mobile App-Based Interventions to Support Diabetes Self-Management: A Systematic Review of Randomized Controlled Trials to Identify Functions Associated with Glycemic Efficacy
Source: JMIR Mhealth Uhealth. 2017 Mar 14;5(3):e35. doi: 10.2196/mhealth.6522 (PMC5373677; doi:10.2196/mhealth.6522)
Supplement: Multimedia Appendix 8 [file mhealth_v5i3e35_app8.pdf]

## Multimedia Appendix 10. Classifications of the patient-clinician communication function

| First author and year | Intervention                                            | Frequency                          | Method                                  | Delivery personnel  | Intensity of communications                                                                                                                                                                                                                         |
|-----------------------|---------------------------------------------------------|------------------------------------|-----------------------------------------|---------------------|-----------------------------------------------------------------------------------------------------------------------------------------------------------------------------------------------------------------------------------------------------|
| Hsu 2016              | Cloud-based diabetes management program                 | Weekly                             | Secure text messages and virtual visits | Healthcare provider | The streamlined communications tools were integrated into the application. The shared decision-making interfaces charts to help the subjects and HCPs.                                                                                              |
| Baron 2016            | Mobile telehealth (MTH)                                 | NR                                 | Web portal                              | Nurse               | The MTH nurses accessed the data transmitted to the server via a Web portal also accessible to MTH patients who supported insulin titration.                                                                                                        |
| Katalenich 2015       | Diabetes Remote Monitoring and Management System (DRMS) | Hyper- or hypo-glycaemia emergency | In-app connection                       | Endocrinologist     | When a participant submitted extreme values of blood glucose, the patient was immediately and automatically connected to the endocrinologist on call.                                                                                               |
| Holmen 2014           | Few Touch application (FTA)                             | 5 telephone calls in 4 months      | Telephone calls                         | Nurse               | The participants received 5 telephone calls from the nurse during the first 4 months, each of which lasted for an average of 20 minutes. A schedule for each conversation was developed before the study by an interdisciplinary research team.     |
| Waki 2014             | DiaBetics                                               | If necessary                       | Telephone call                          | Physician           | Readings defined as abnormal—blood glucose above 400 mg/dl or below 40 mg/dl, and systolic blood pressure above 220 mmHg—are reported to a doctor as “Dr Call,” meaning a physician will check the data and interact with the patient if necessary. |
| Rossi 2013            | Diabetes Interactive Diary                              | NR                                 | Text messages                           | Physician           | In-app communication between patient and physician via text messages.                                                                                                                                                                               |
| Charpentier 2011      | Diabeo (on market app)                                  | Every two weeks;                   | Video calls                             | Doctor              | Teleconsultations were conducted with both patients and doctors in front of their computers or smartphone displaying last weeks’ data and focused on insulin dose                                                                                   |

|                 |                                     |               |                   |                         |                                                                                                                                               |
|-----------------|-------------------------------------|---------------|-------------------|-------------------------|-----------------------------------------------------------------------------------------------------------------------------------------------|
|                 |                                     |               |                   |                         | adjustments and motivational support;                                                                                                         |
| Rossi 2010      | Diabetes Interactive Diary          | NR            | Text messages     | Physician and dietitian | A telemedicine system based on the communication between a health care professional (physician or dietitian) and a patient via text messages. |
| Istepanian 2009 | Mobile health technology            | If necessary  | Telephone call    | Research team           | Patients could use the mobile phones to contact the research team for clinical and technical support.                                         |
| Quinn 2008      | WellDoc's Diabetes Manager software | Every 2 weeks | In-app connection | Healthcare provider     | In-app call to reach their HCP.                                                                                                               |
